# Supplementary material for: Smart emissive hybrid dynamer and nanocomposite made of complementary organic and inorganic emitters combined via a supramolecular Janus synthon
Source: Royal Society of Chemistry journal article supplement (doi:10.1039/d4tc01043d), 2024-01-01
Supplement: d4tc01043d1.pdf [file d4tc01043d1.pdf]

## Electronic supplementary information

### Smart Emissive Hybrid Dynamer and Nanocomposite Made of Complementary Organic and Inorganic Emitters Combined *via* a Supramolecular Janus Synthon

Ilya V. Kashnik,<sup>a,b</sup> Jeanne Rebours,<sup>a</sup> Noée Dumait,<sup>a</sup> Konstantin A. Brylev,<sup>b</sup> and Yann Molard<sup>\*,a</sup>

---

[a] I. V. Kashnik, Jeanne Rebours, Noée Dumait, Pr. Yann Molard  
Université de Rennes, CNRS, ISCR – UMR 6226, ScanMAT – UAR 2025, Rennes F-35000, France  
E-mail: yann.molard@univ-rennes.fr

[b] I. V. Kashnik, Pr. K.A. Brylev  
Nikolaev Institute of Inorganic Chemistry SB RAS, 3 Acad. Lavrentiev ave., 630090 Novosibirsk, Russian Federation

#### Table of contents

|      |                                                                                                  |     |
|------|--------------------------------------------------------------------------------------------------|-----|
| 1.   | NMR spectra .....                                                                                | S2  |
| 2.   | Binding constant determination .....                                                             | S10 |
| 2.1. | Binding constant for DAPI <sub>m</sub> Br and An-Th .....                                        | S10 |
| 2.2. | Binding constant for (DAPI <sub>m</sub> ) <sub>2</sub> Mo <sub>6</sub> and An-Th .....           | S10 |
| 2.3. | Evidence of binding between (DAPI <sub>m</sub> ) <sub>2</sub> Mo <sub>6</sub> and Th-An-Th ..... | S11 |
| 3.   | Absorption spectra .....                                                                         | S12 |
| 4.   | Emission decay profiles.....                                                                     | S13 |
| 5.   | Emission spectra .....                                                                           | S19 |
| 6.   | Förster radius determination.....                                                                | S20 |
| 7.   | Emission titration data.....                                                                     | S21 |
| 8.   | Emission evolution in vacuum .....                                                               | S23 |

# 1. NMR spectra

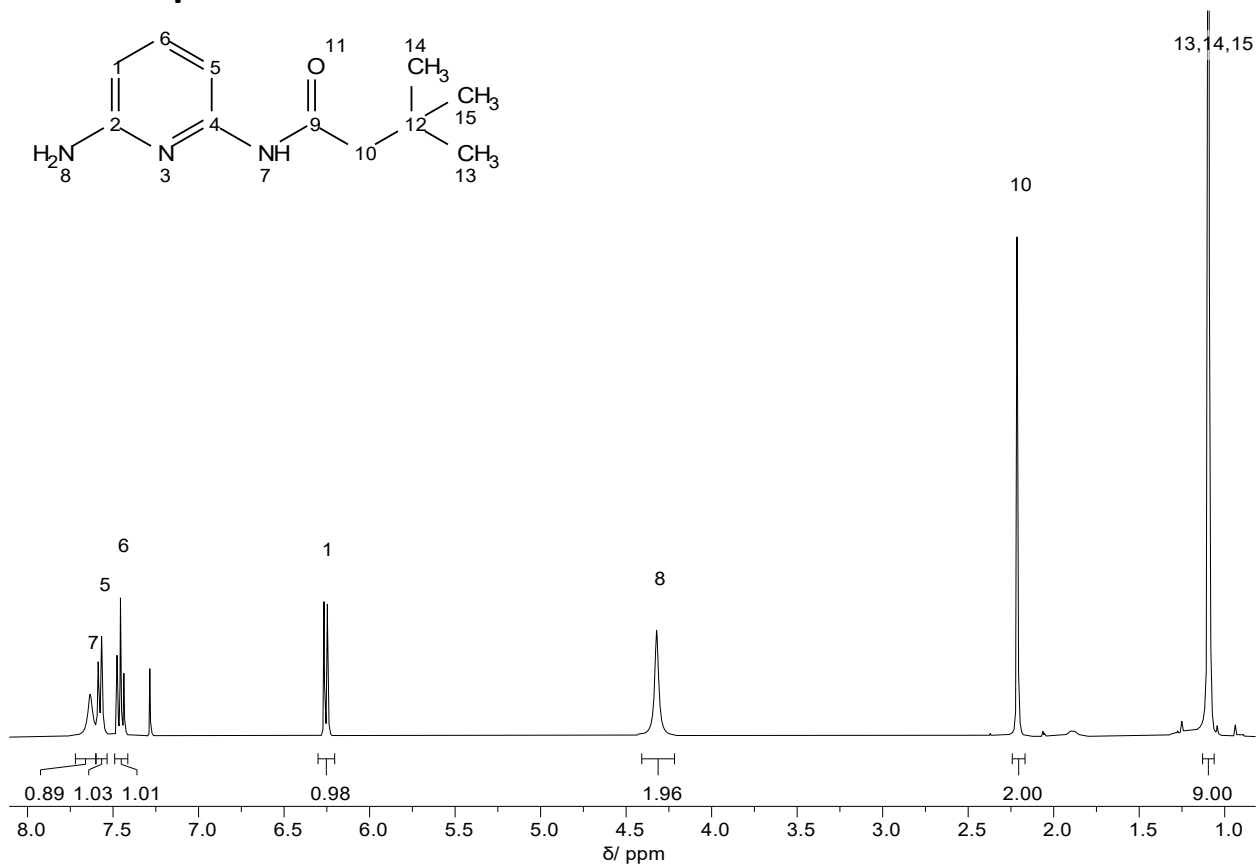

Figure S1. 400 MHz <sup>1</sup>H NMR spectrum in CDCl<sub>3</sub> of 2

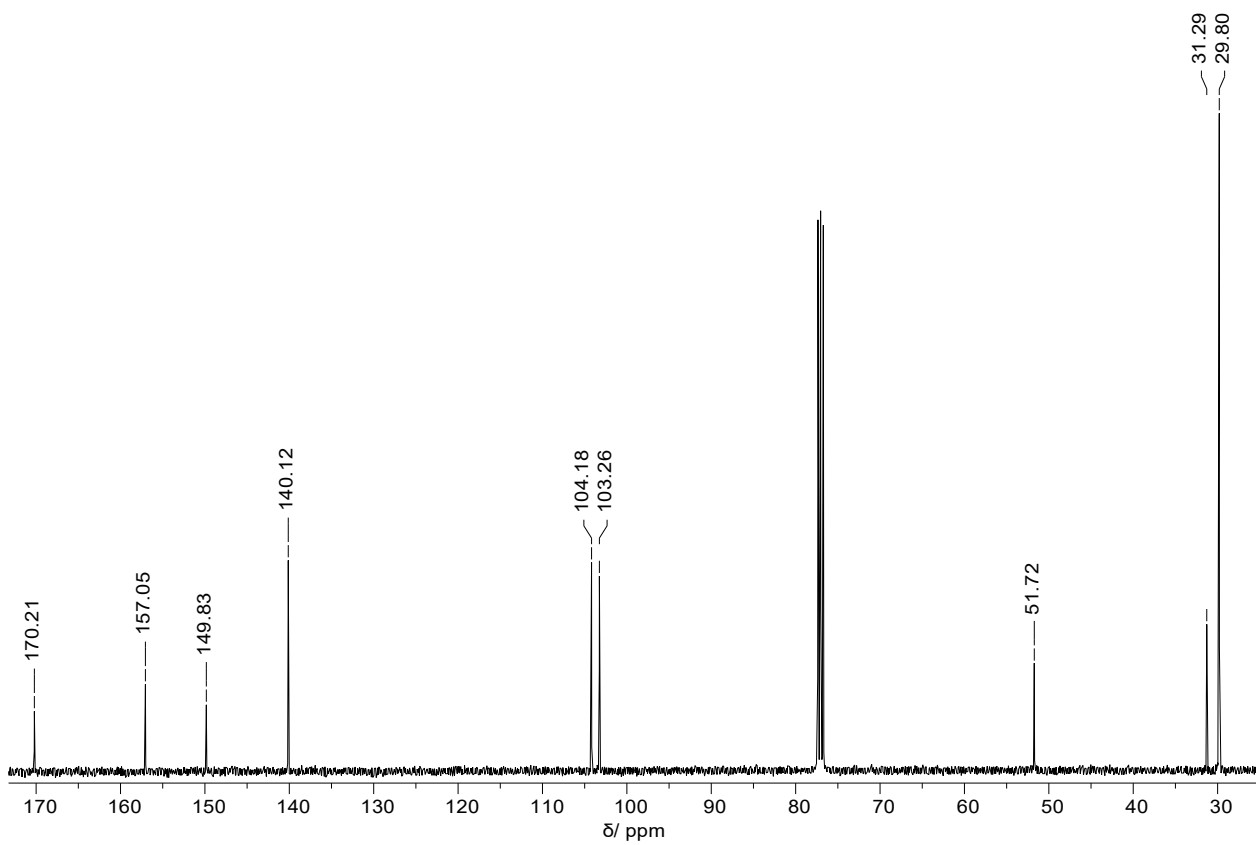

Figure S2. 101 MHz <sup>13</sup>C NMR spectrum in CDCl<sub>3</sub> of 2

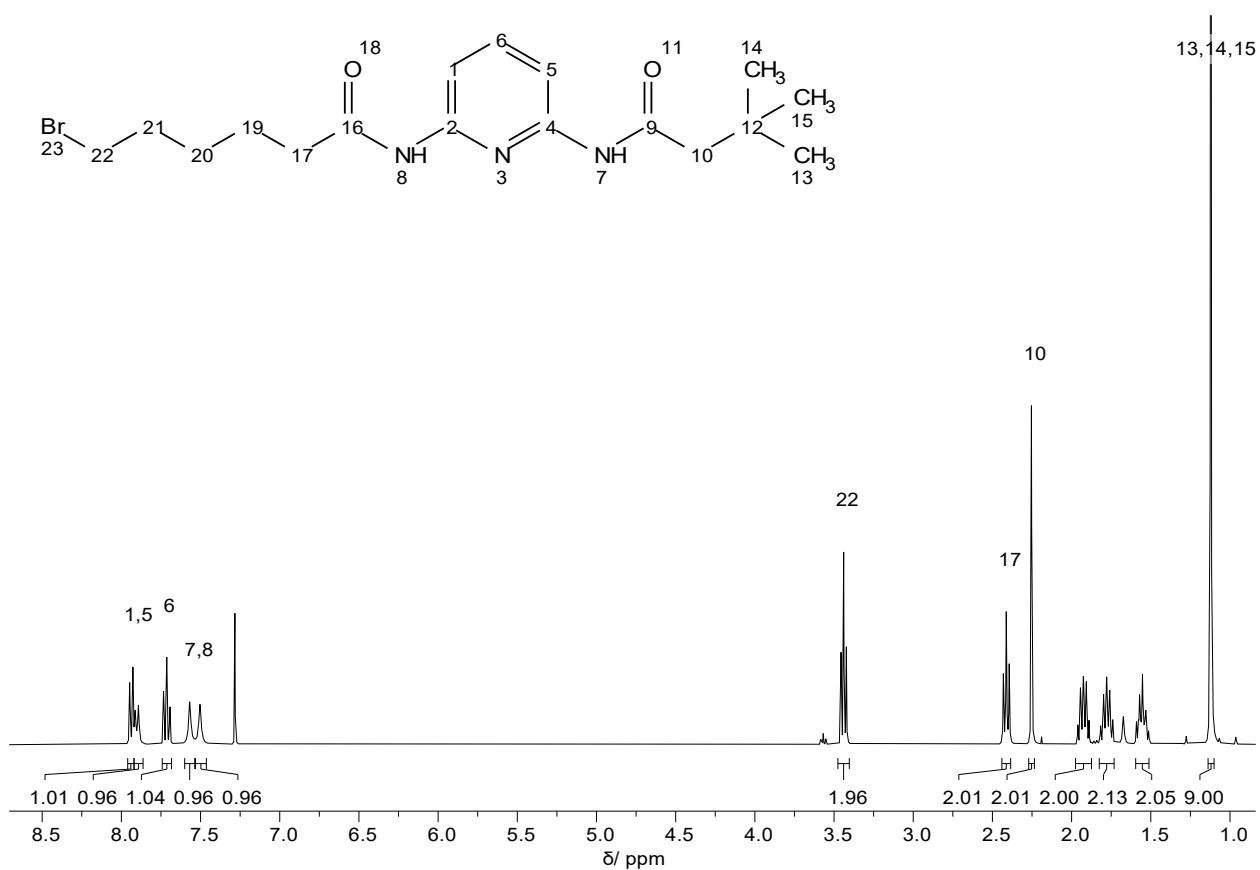

Figure S3. 400 MHz  $^1\text{H}$  NMR spectrum in  $\text{CDCl}_3$  of **3**

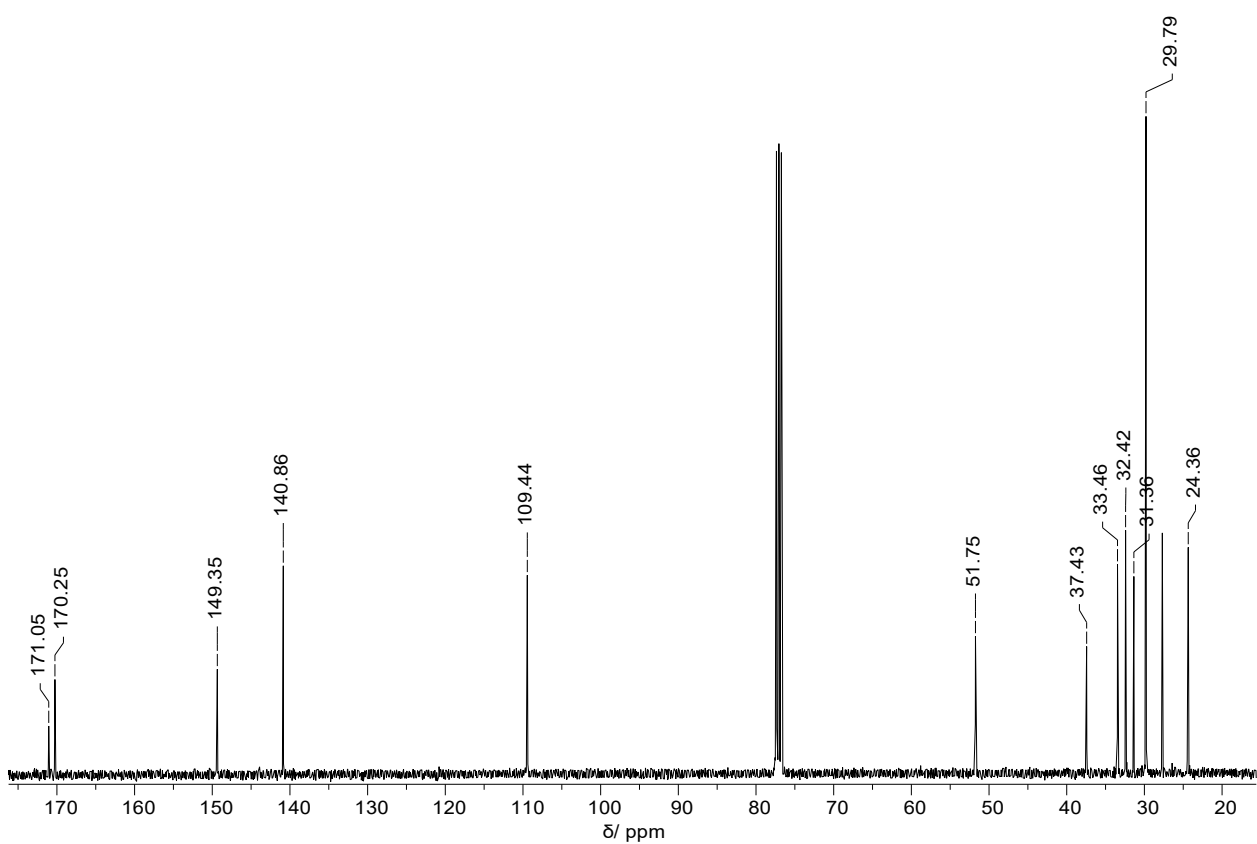

Figure S4. 101 MHz  $^{13}\text{C}$  NMR spectrum in  $\text{CDCl}_3$  of **3**

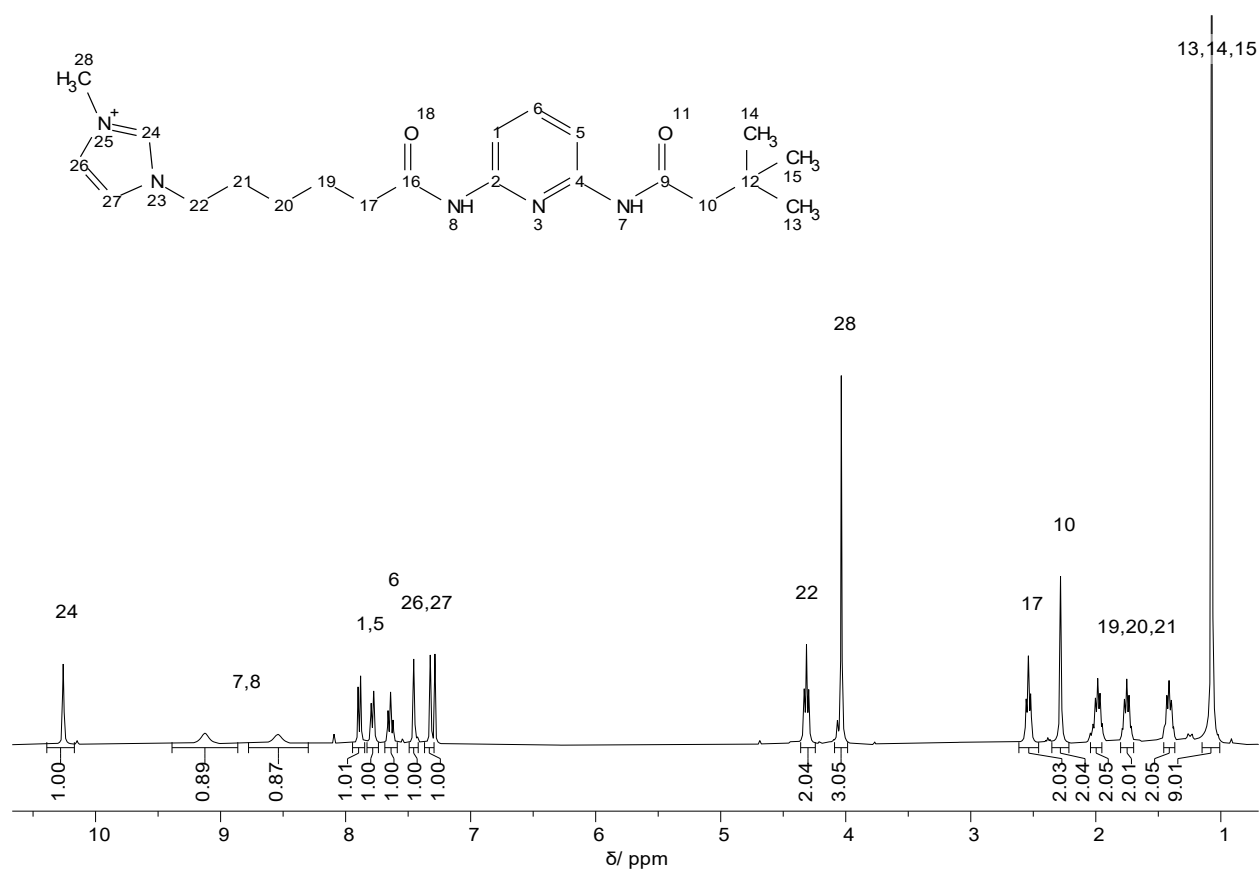

Figure S5. 400 MHz  $^1\text{H}$  NMR spectrum in  $\text{CDCl}_3$  of DAPImBr

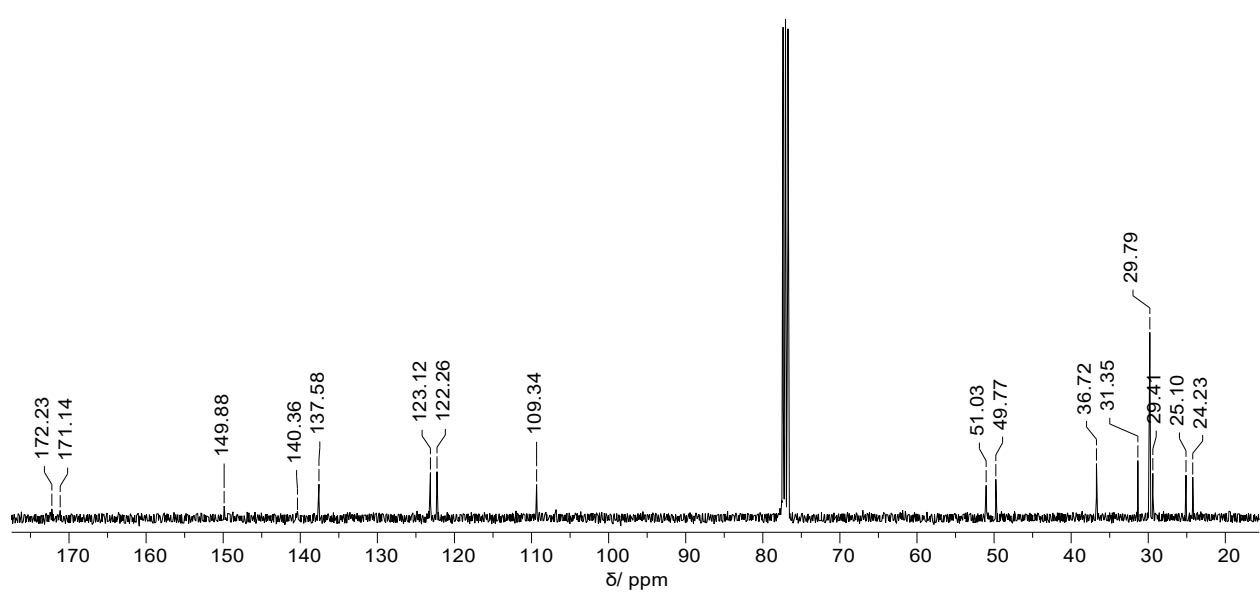

Figure S6. 101 MHz  $^{13}\text{C}$  NMR spectrum in  $\text{CDCl}_3$  of DAPImBr

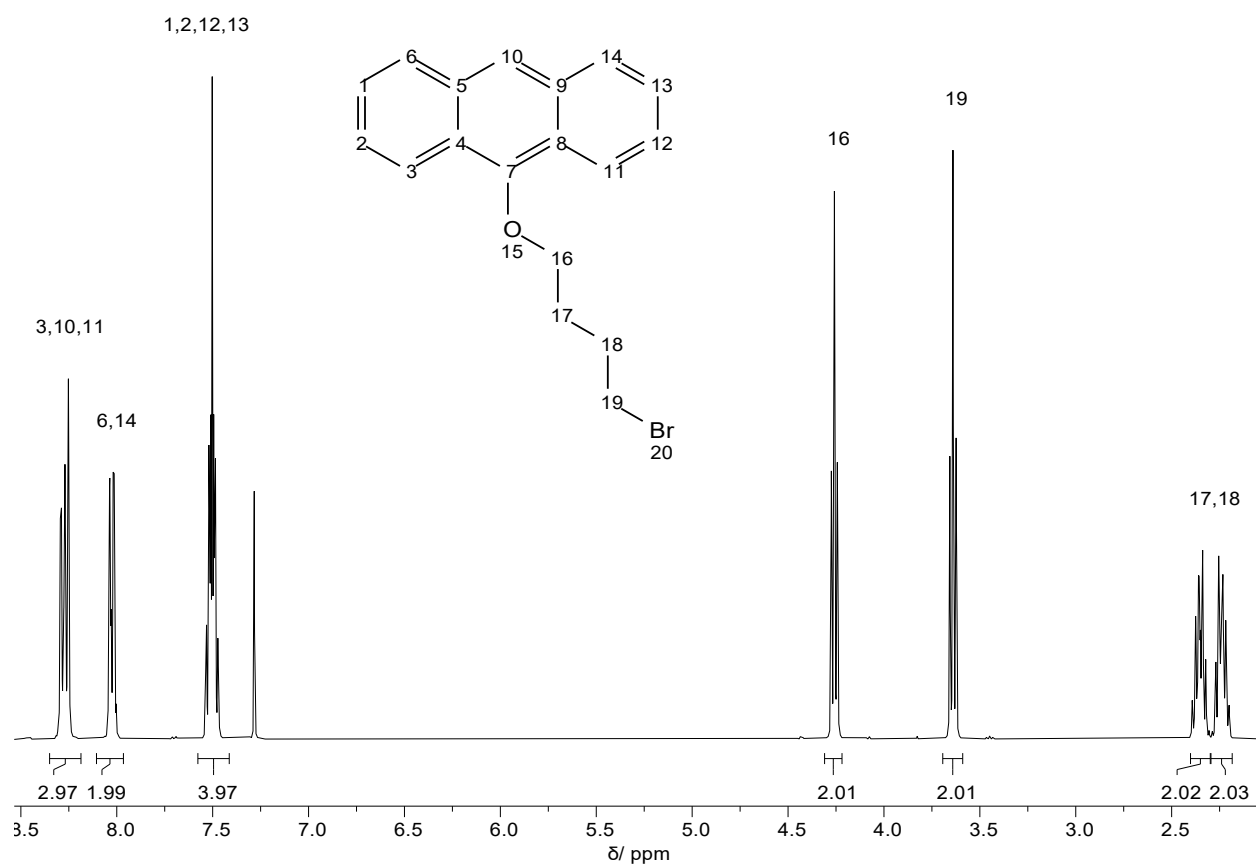

Figure S7. 400 MHz  $^1\text{H}$  NMR spectrum in  $\text{CDCl}_3$  of **5**

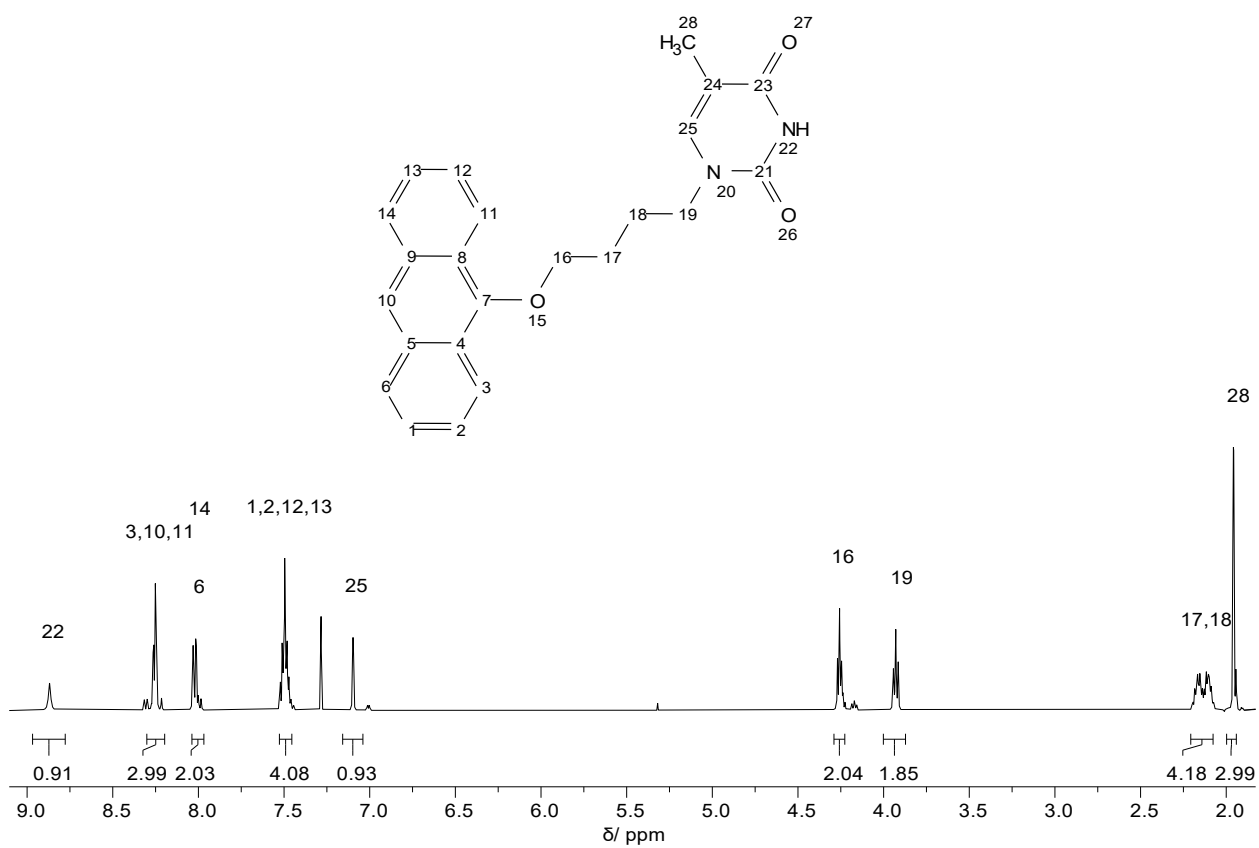

Figure S8. 500 MHz  $^1\text{H}$  NMR spectrum in  $\text{CDCl}_3$  of **An-Th**

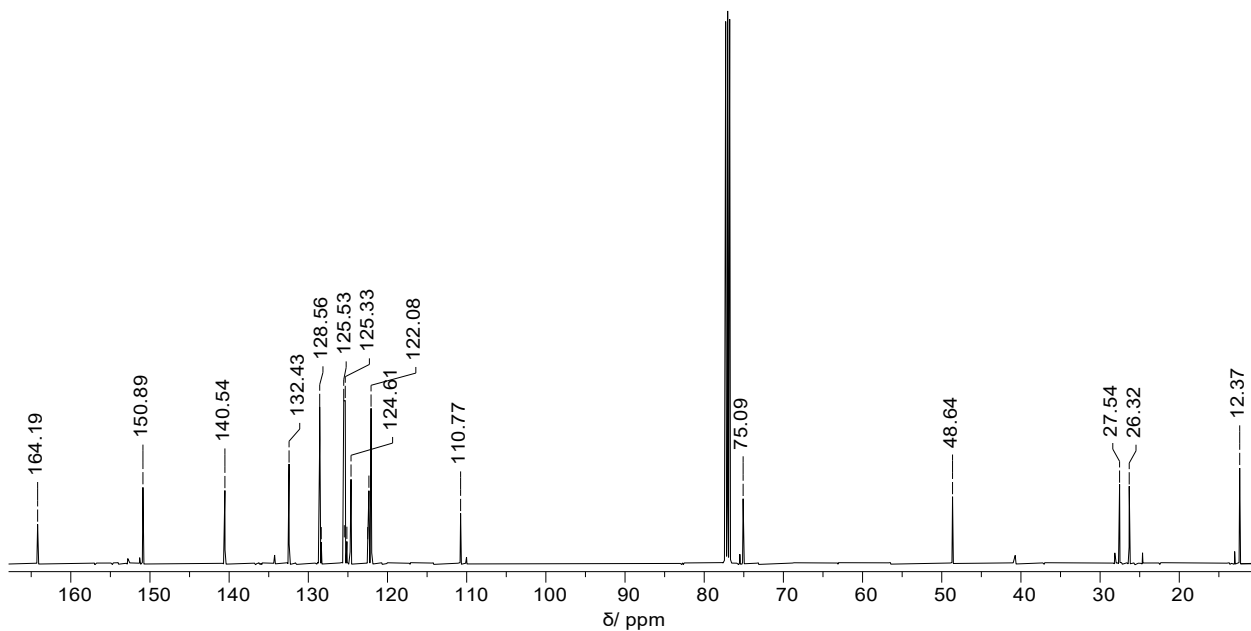

Figure S9. 126 MHz  $^{13}\text{C}$  NMR spectrum in  $\text{CDCl}_3$  of An-Th

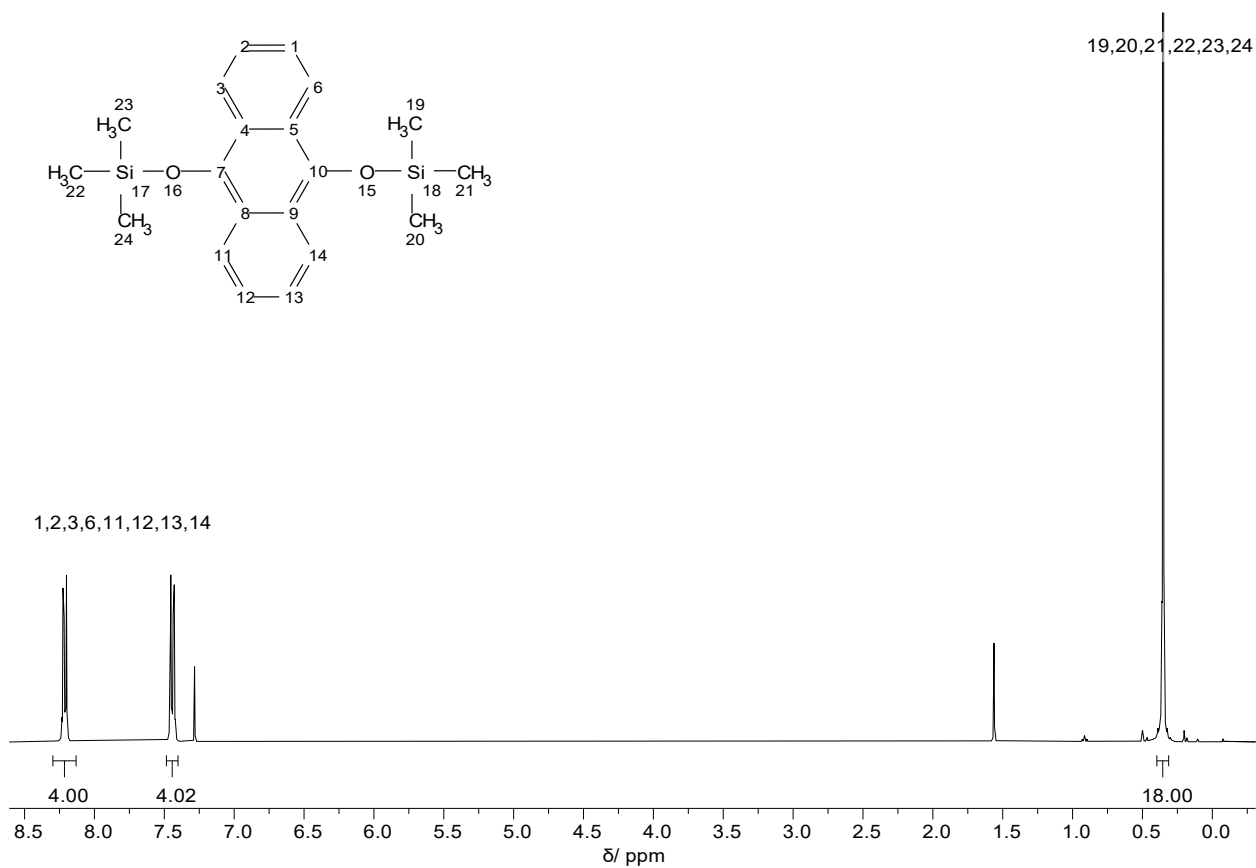

Figure S10. 400 MHz  $^1\text{H}$  NMR spectrum in  $\text{CDCl}_3$  of **7**

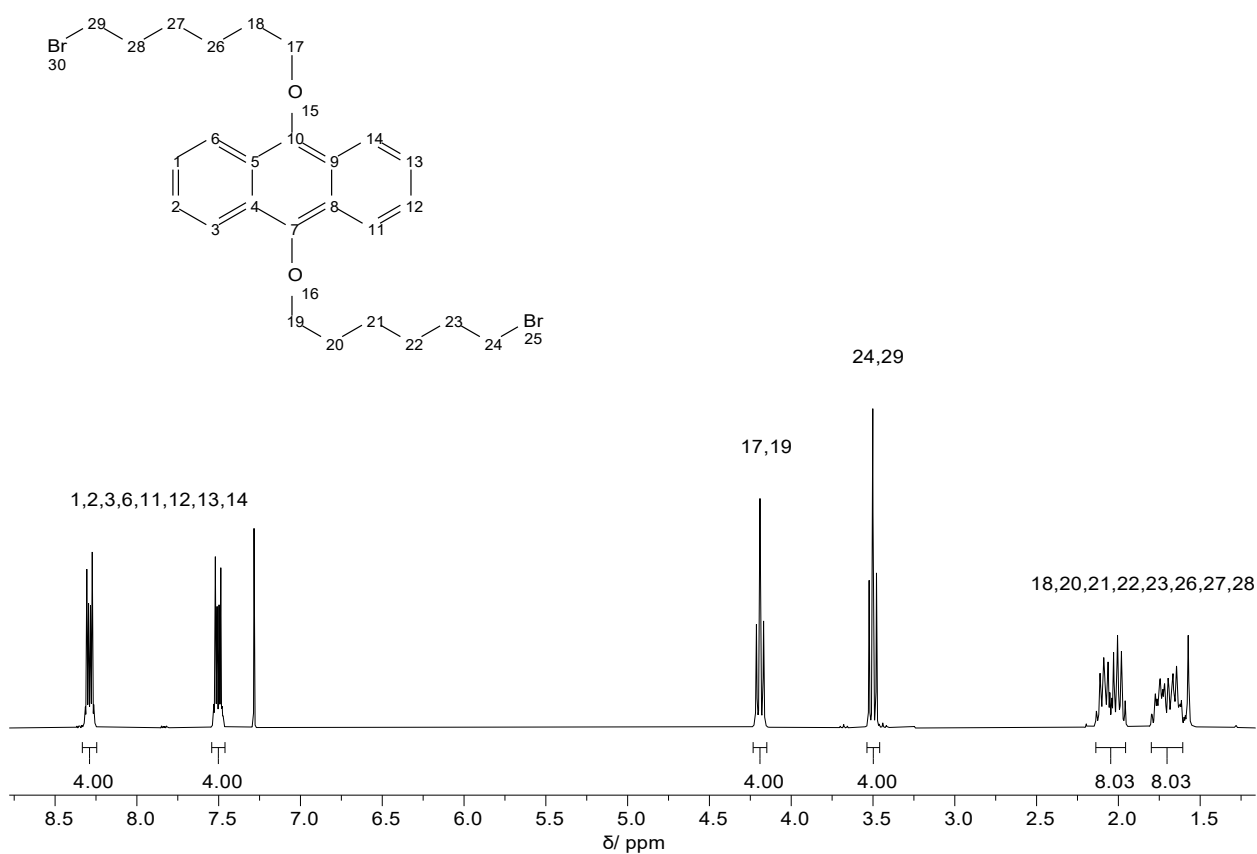

**Figure S11.** 300 MHz <sup>1</sup>H NMR spectrum in CDCl<sub>3</sub> of **8**

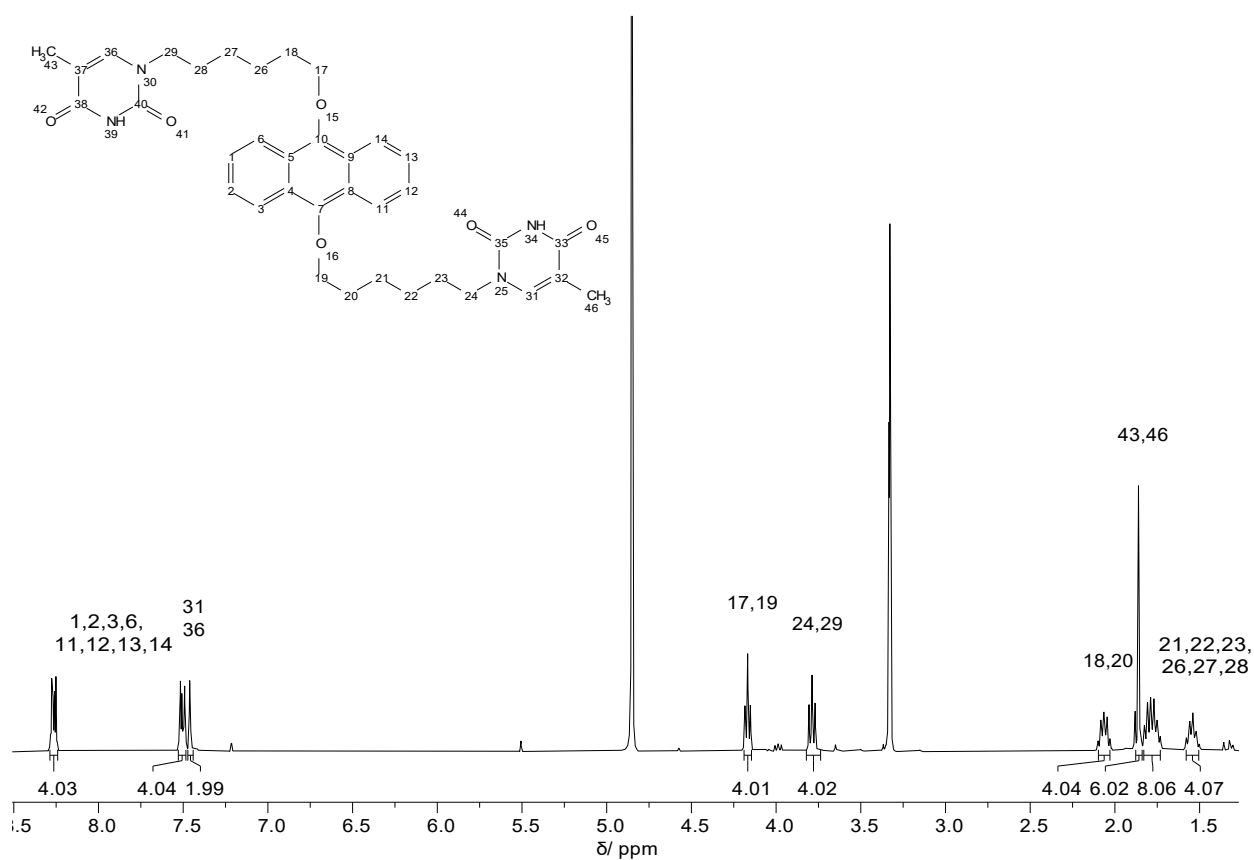

**Figure S12.** 400 MHz <sup>1</sup>H NMR spectrum in CD<sub>3</sub>OD of **Th-An-Th**

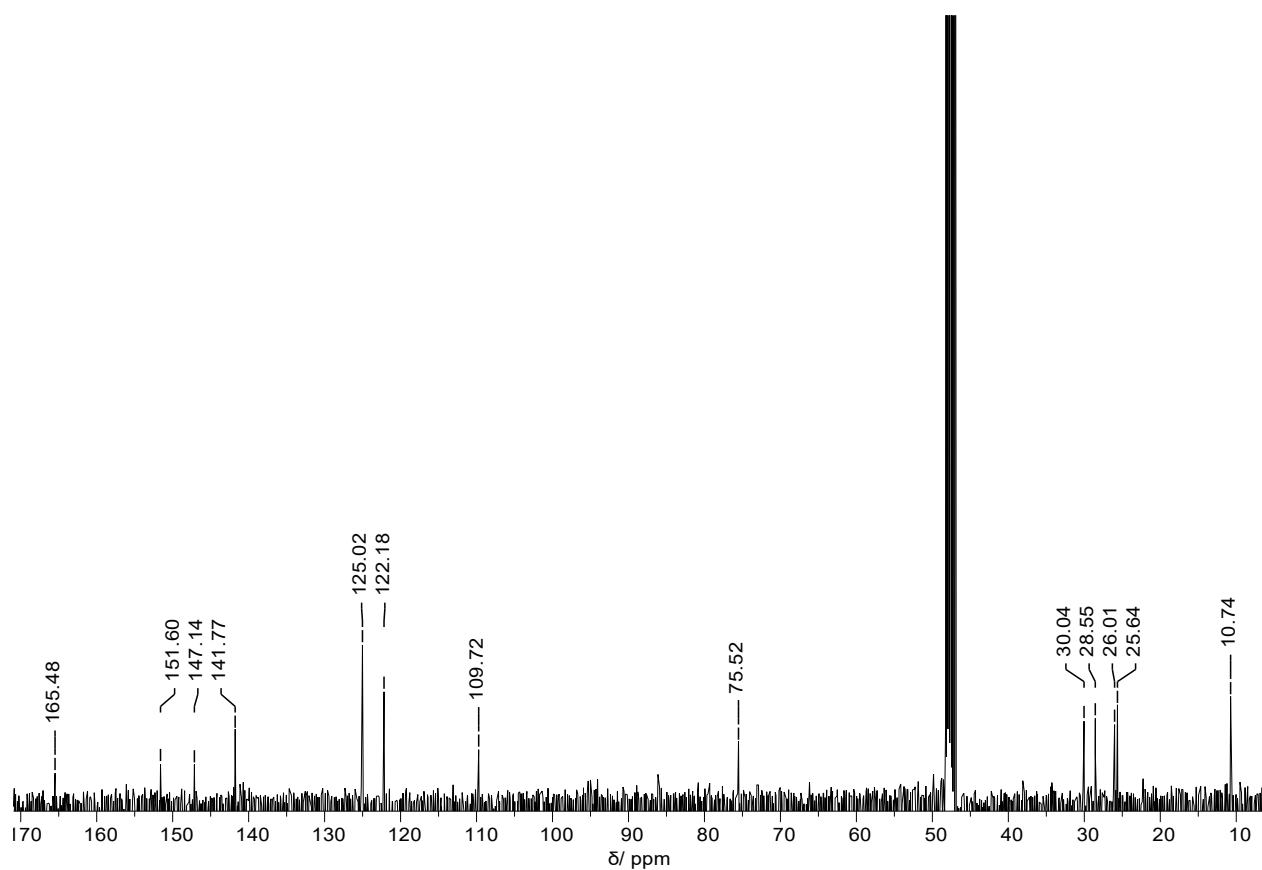

Figure S13. 101 MHz  $^{13}\text{C}$  NMR spectrum in  $\text{CD}_3\text{OD}$  of Th-An-Th

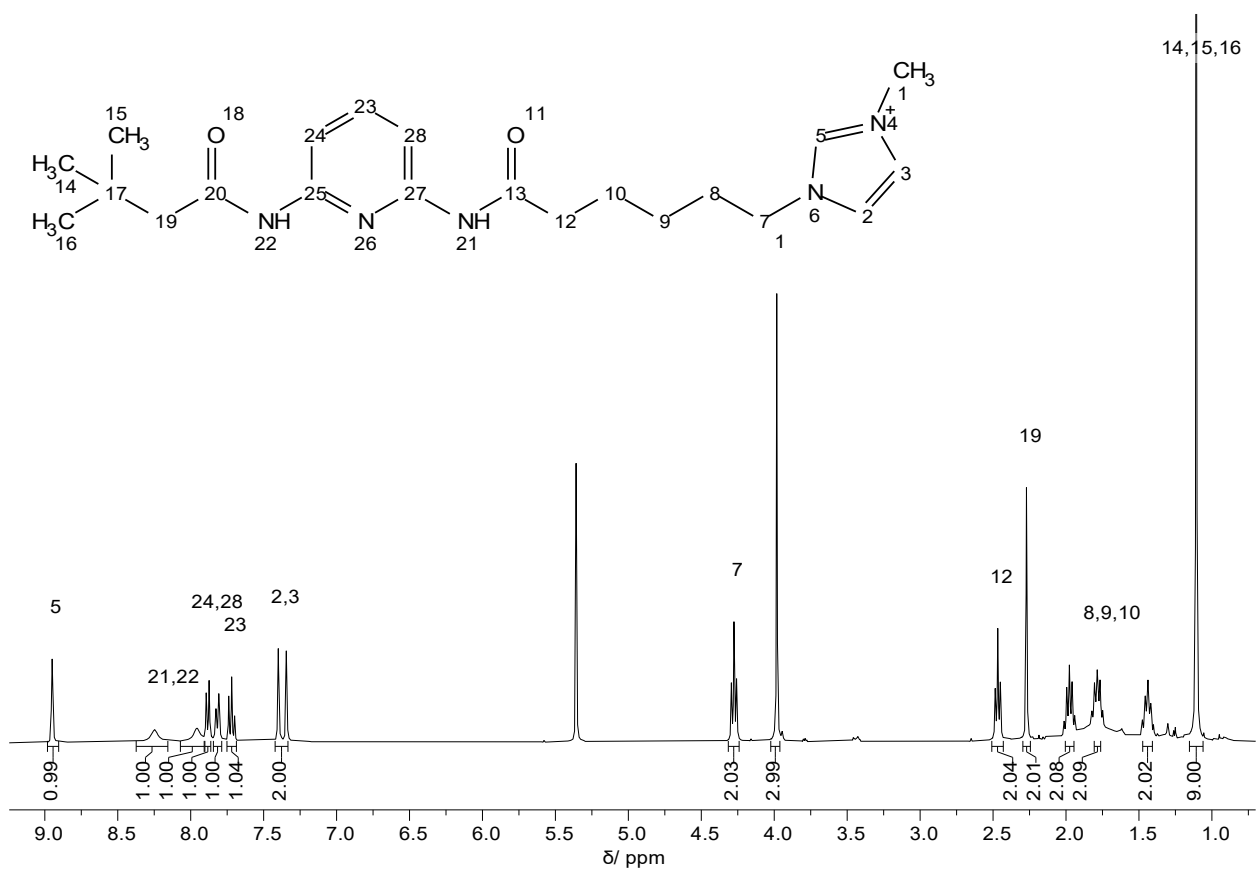

Figure S14. 400 MHz  $^1\text{H}$  NMR spectrum in  $\text{CD}_2\text{Cl}_2$  of  $(\text{DAPIm})_2\text{Mo}_6$



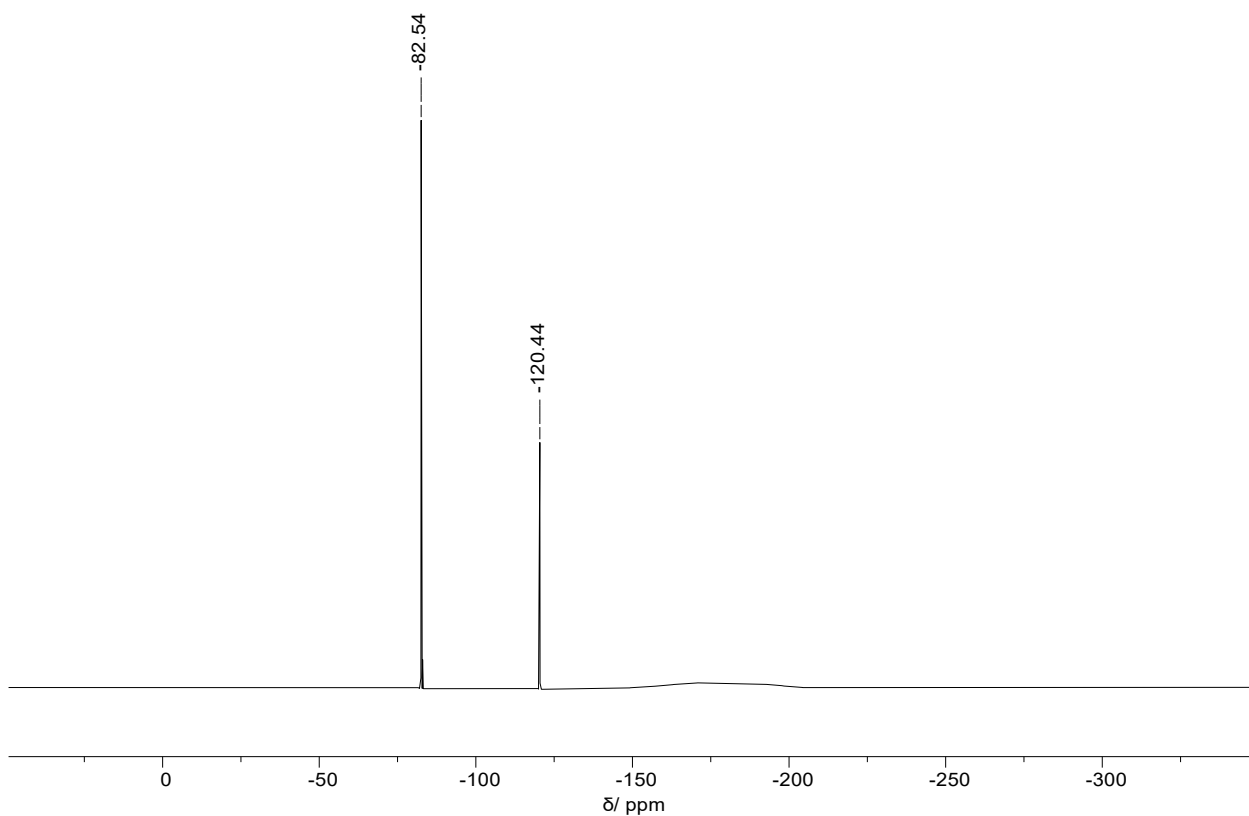

Figure S15. 376 MHz  $^{19}\text{F}$  NMR spectrum in  $\text{CD}_2\text{Cl}_2$  of  $(\text{DAPIm})_2\text{Mo}_6$

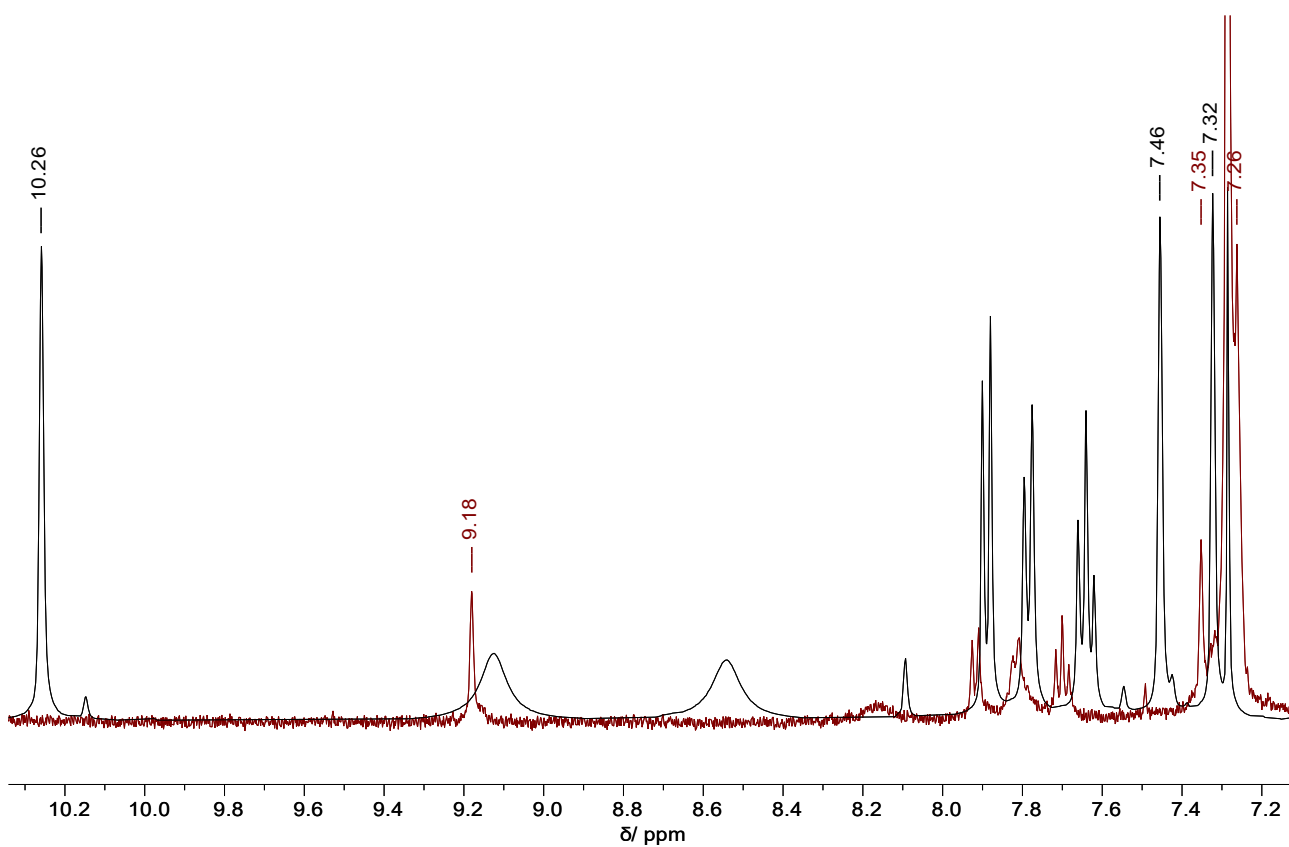

Figure S16. Comparison of  $^1\text{H}$  NMR spectra in  $\text{CDCl}_3$  of  $\text{DAPImBr}$  (black line,  $C = 4.3 \cdot 10^{-5}\text{M}$ ) and  $(\text{DAPIm})_2\text{Mo}_6$  (red line,  $C = 4.5 \cdot 10^{-6}\text{M}$ )

## 2. Binding constant determination

### 2.1. Binding constant for DAPI<sup>m</sup>Br and An-Th

Table S1. NMR titration data for determination of binding constant in CDCl<sub>3</sub> between DAPI<sup>m</sup>Br and An-Th

| No | [DAPI <sup>m</sup> ], M | [An-Th], M            | [An-Th]/[DAPI <sup>m</sup> ] | NH-1, ppm | NH-2, ppm | K, M <sup>-1</sup> |
|----|-------------------------|-----------------------|------------------------------|-----------|-----------|--------------------|
| 1  | 9.86·10 <sup>-4</sup>   | 0                     | 0                            | 8.32      | 8.98      | 261±2              |
| 2  | 9.86·10 <sup>-4</sup>   | 9.77·10 <sup>-4</sup> | 0.99                         | 8.66      | 9.23      |                    |
| 3  | 9.86·10 <sup>-4</sup>   | 1.91·10 <sup>-3</sup> | 1.94                         | 8.91      | 9.40      |                    |
| 4  | 9.86·10 <sup>-4</sup>   | 2.79·10 <sup>-3</sup> | 2.83                         | 9.09      | 9.52      |                    |
| 5  | 9.86·10 <sup>-4</sup>   | 3.64·10 <sup>-3</sup> | 3.69                         | 9.23      | 9.61      |                    |
| 6  | 9.86·10 <sup>-4</sup>   | 4.45·10 <sup>-3</sup> | 4.51                         | 9.33      | 9.68      |                    |
| 7  | 9.86·10 <sup>-4</sup>   | 5.23·10 <sup>-3</sup> | 5.30                         | 9.42      | 9.74      |                    |
| 8  | 9.86·10 <sup>-4</sup>   | 6.68·10 <sup>-3</sup> | 6.77                         | 9.55      | 9.82      |                    |
| 9  | 9.86·10 <sup>-4</sup>   | 8.01·10 <sup>-3</sup> | 8.12                         | 9.64      | 9.89      |                    |
| 10 | 9.86·10 <sup>-4</sup>   | 9.24·10 <sup>-3</sup> | 9.37                         | 9.70      | 9.93      |                    |
| 11 | 9.86·10 <sup>-4</sup>   | 1.09·10 <sup>-2</sup> | 11.05                        | 9.78      | 9.98      |                    |

### 2.2. Binding constant for (DAPI<sup>m</sup>)<sub>2</sub>Mo<sub>6</sub> and An-Th

Table S2. NMR titration data for determination of binding constant in CDCl<sub>3</sub> between (DAPI<sup>m</sup>)<sub>2</sub>Mo<sub>6</sub> and An-Th

| No | [DAPI <sup>m</sup> ], M | [An-Th], M            | [An-Th]/[DAPI <sup>m</sup> ] | NH-1, ppm | NH-2, ppm | K, M <sup>-1</sup> |
|----|-------------------------|-----------------------|------------------------------|-----------|-----------|--------------------|
| 1  | 1.03·10 <sup>-3</sup>   | 0                     | 0                            | 7.81      | 8.17      | 420±3              |
| 2  | 1.03·10 <sup>-3</sup>   | 9.39·10 <sup>-4</sup> | 0.91                         | 8.36      | 8.68      |                    |
| 3  | 1.03·10 <sup>-3</sup>   | 1.83·10 <sup>-3</sup> | 1.78                         | 8.74      | 9.01      |                    |
| 4  | 1.03·10 <sup>-3</sup>   | 2.69·10 <sup>-3</sup> | 2.61                         | 9.00      | 9.23      |                    |
| 5  | 1.03·10 <sup>-3</sup>   | 3.50·10 <sup>-3</sup> | 3.40                         | 9.18      | 9.40      |                    |
| 6  | 1.03·10 <sup>-3</sup>   | 4.23·10 <sup>-3</sup> | 4.11                         | 9.31      | 9.52      |                    |
| 7  | 1.03·10 <sup>-3</sup>   | 5.02·10 <sup>-3</sup> | 4.87                         | 9.42      | 9.61      |                    |
| 8  | 1.03·10 <sup>-3</sup>   | 6.42·10 <sup>-3</sup> | 6.23                         | 9.56      | 9.74      |                    |
| 9  | 1.03·10 <sup>-3</sup>   | 7.70·10 <sup>-3</sup> | 7.48                         | 9.66      | 9.83      |                    |
| 10 | 1.03·10 <sup>-3</sup>   | 8.88·10 <sup>-3</sup> | 8.62                         | 9.73      | 9.89      |                    |
| 11 | 1.03·10 <sup>-3</sup>   | 9.98·10 <sup>-3</sup> | 9.69                         | 9.78      | 9.93      |                    |
| 12 | 1.03·10 <sup>-3</sup>   | 1.24·10 <sup>-2</sup> | 12.04                        | 9.87      | 10.00     |                    |

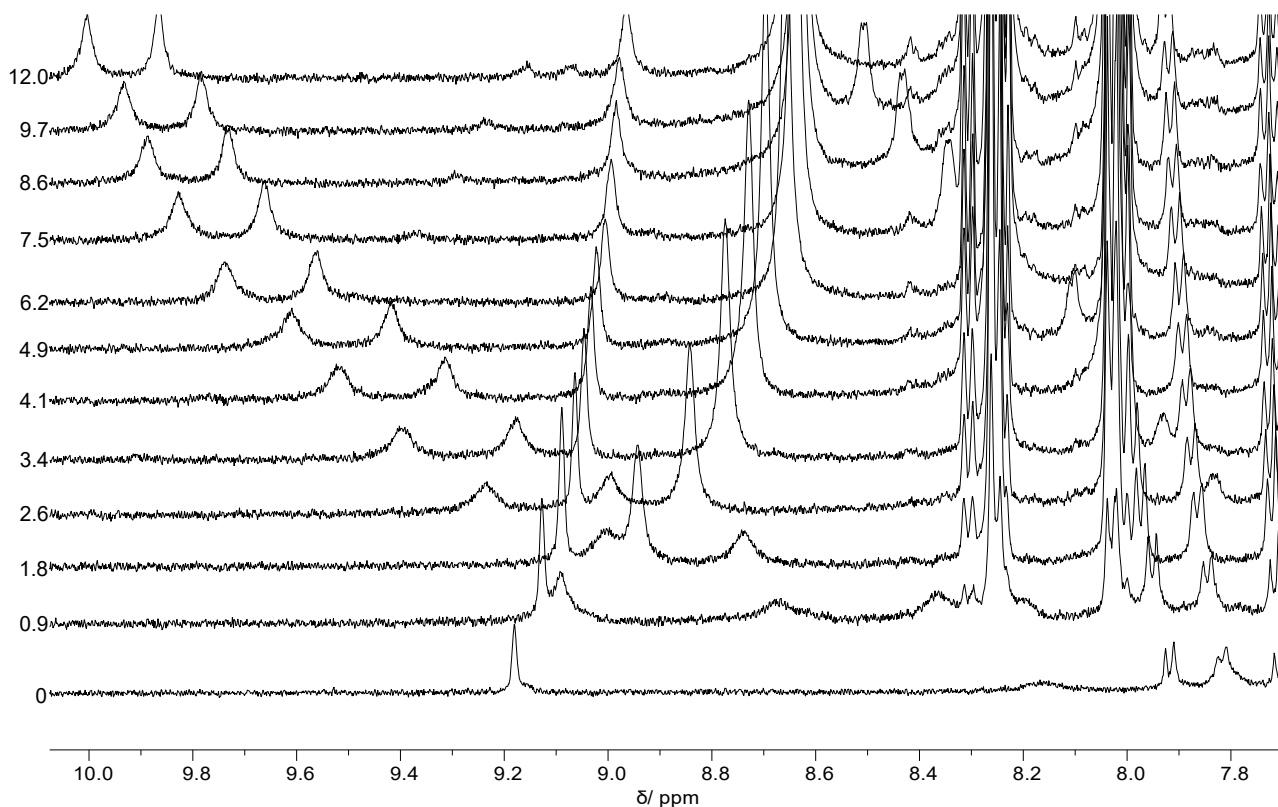

**Figure S17.** 500 MHz  $^1\text{H}$  NMR spectra in  $\text{CDCl}_3$  in the titration experiment with  $(\text{DAPIm})_2\text{Mo}_6$  ( $C = 1.03 \cdot 10^{-3}\text{M}$ ) and **An-Th** (values on the left are referred to the  $[\text{An-Th}]/[\text{DAPIm}^+]$  ratio)

### 2.3. Evidence of binding between $(\text{DAPIm})_2\text{Mo}_6$ and Th-An-Th

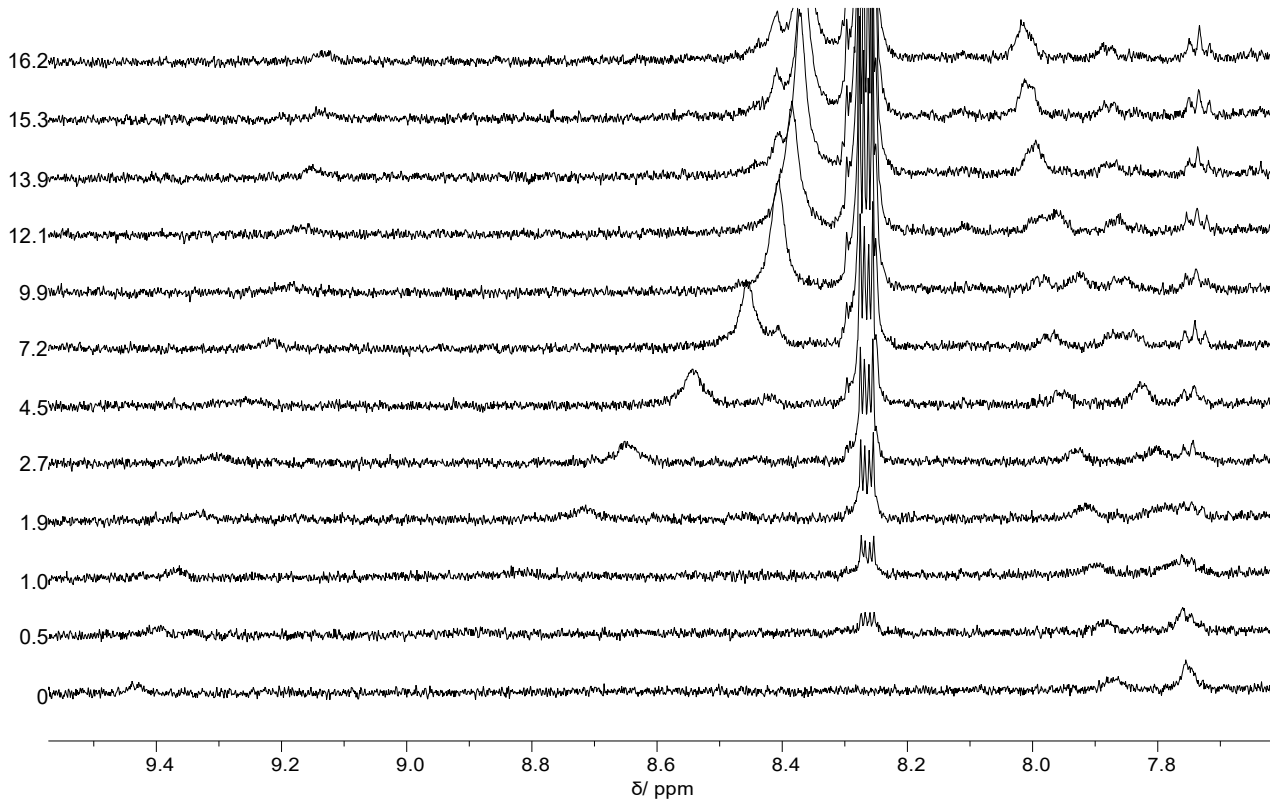

**Figure S18.** 500 MHz  $^1\text{H}$  NMR spectra in  $\text{CDCl}_3$  in the titration experiment with  $(\text{DAPIm})_2\text{Mo}_6$  ( $C = 9.07 \cdot 10^{-5}\text{M}$ ) and **Th-An-Th** (values on the left are referred to the  $[\text{Th-An-Th}]/[\text{DAPIm}^+]$  ratio)

### 3. Absorption spectra

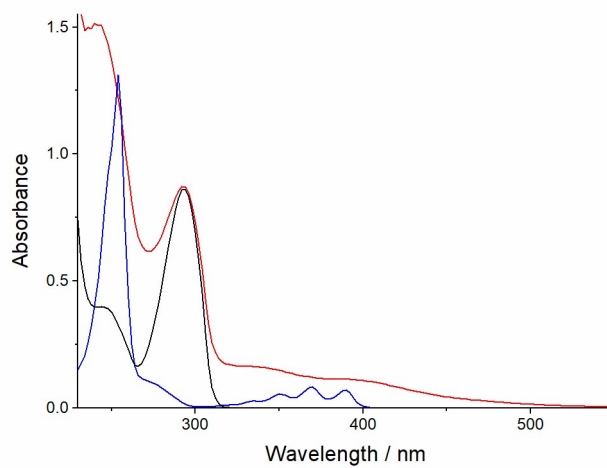

**Figure S19.** Absorption spectra in CH<sub>3</sub>CN of DAPImBr (black line), An-Th (blue line) and (DAPI)m<sub>2</sub>Mo<sub>6</sub> (red)

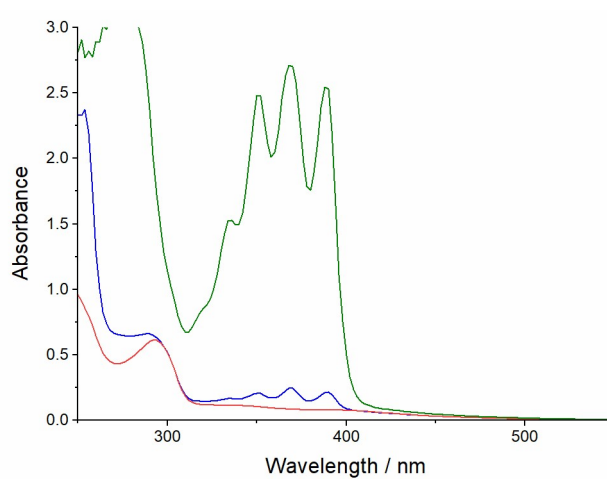

**Figure S20.** Absorption spectra in CH<sub>3</sub>CN of (DAPI)m<sub>2</sub>Mo<sub>6</sub> (red) + 1 equiv An-Th (blue) + excess of AnTh (green)

## 4. Emission decay profiles

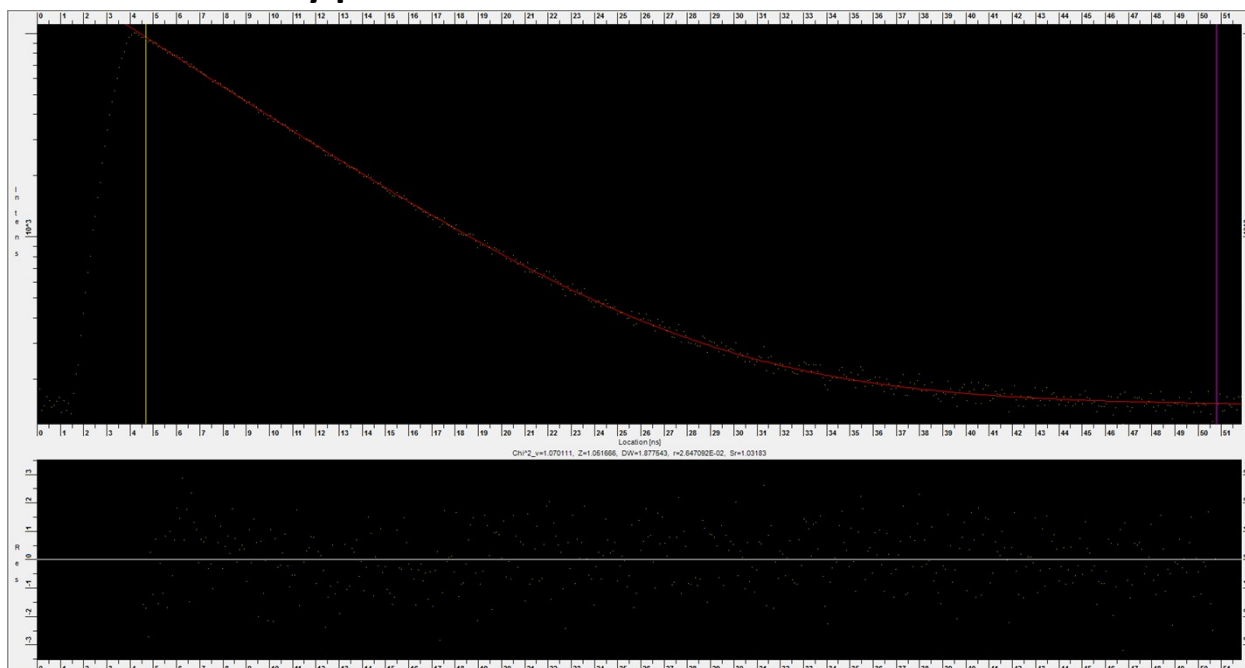

Figure S21. Emission decay profile of An-Th in CHCl<sub>3</sub> ( $\lambda_{\text{ex}} = 375$  nm)

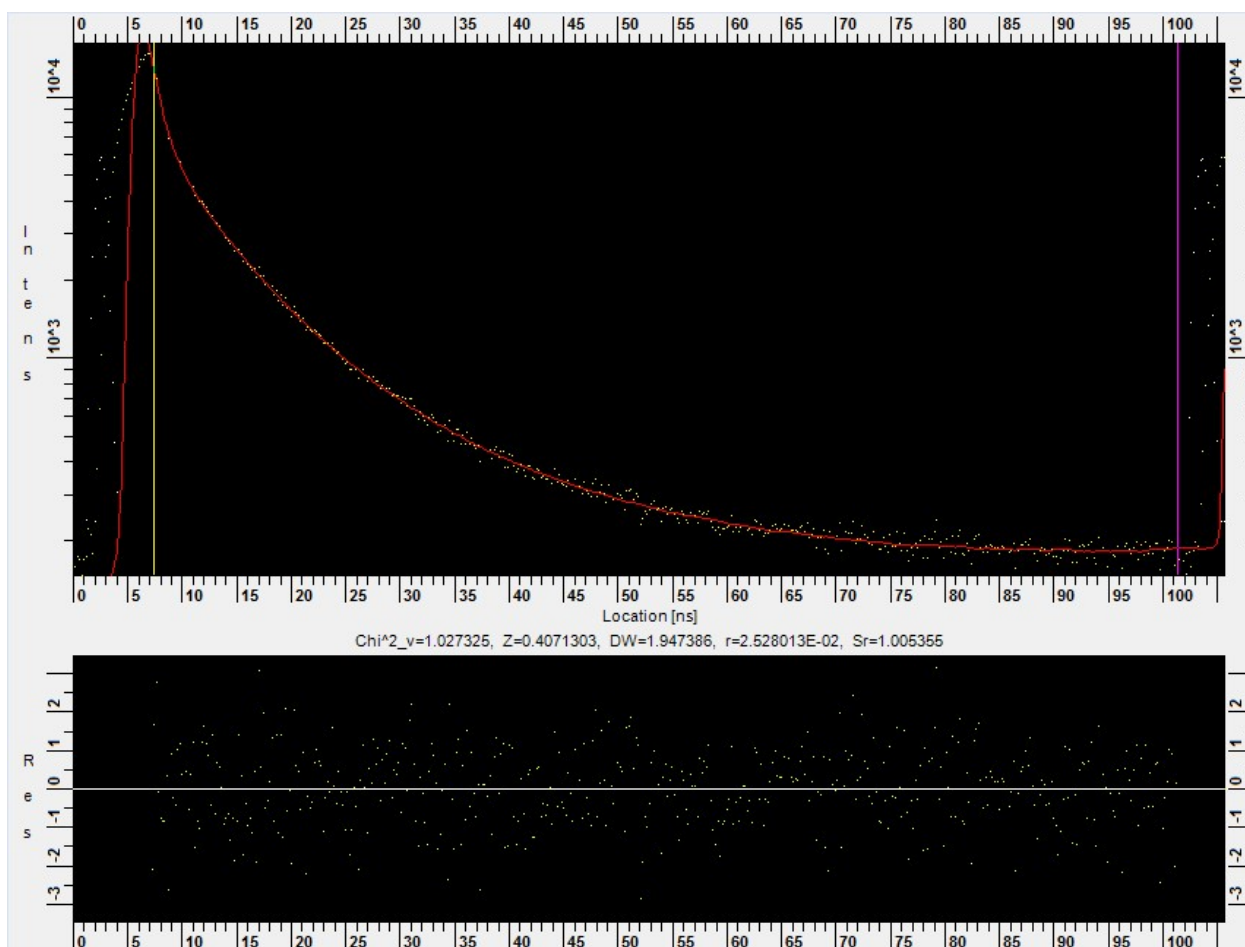

Figure S22. Emission decay profile of Th-An-Th in solid ( $\lambda_{\text{ex}} = 375$  nm)

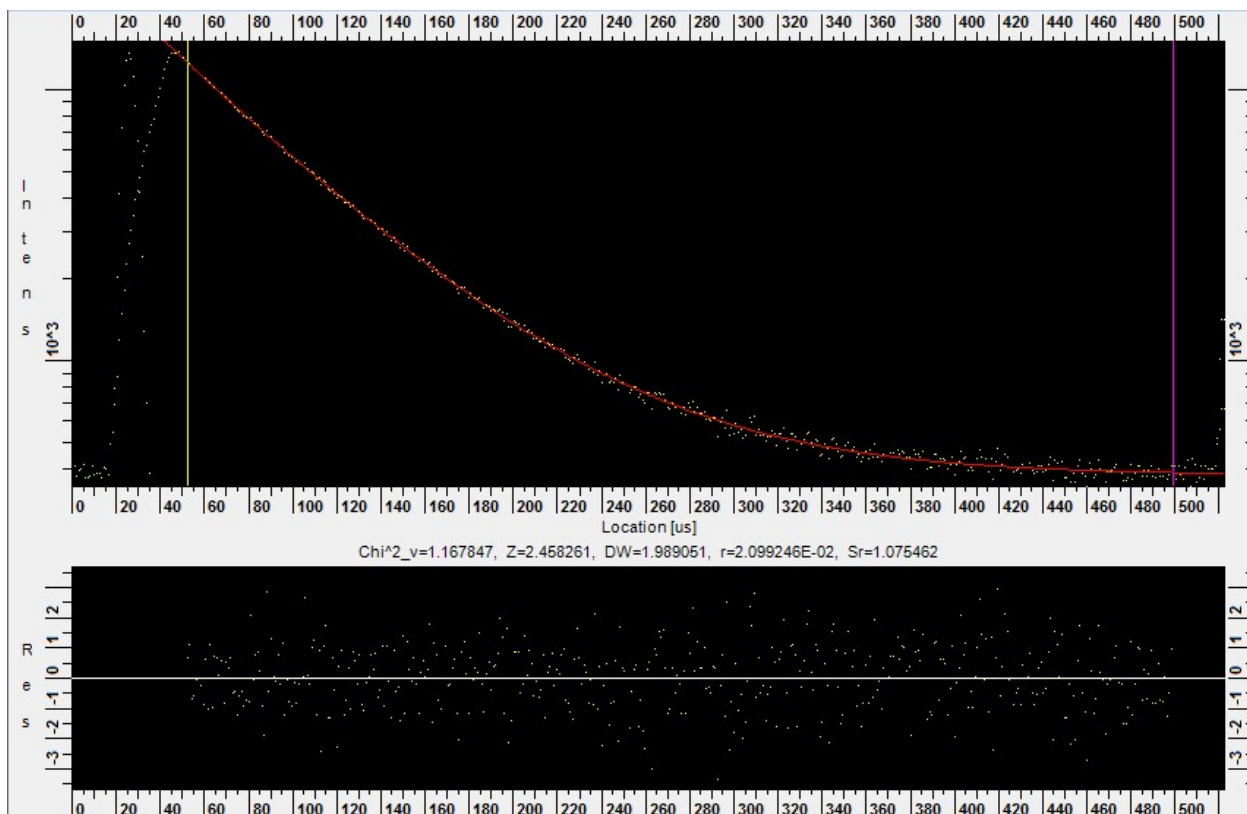

Figure S23. Emission decay profile of  $(\text{DAPIm})_2\text{Mo}_6$  in deaerated (Ar)  $\text{CHCl}_3$  ( $\lambda_{\text{ex}} = 375 \text{ nm}$ )

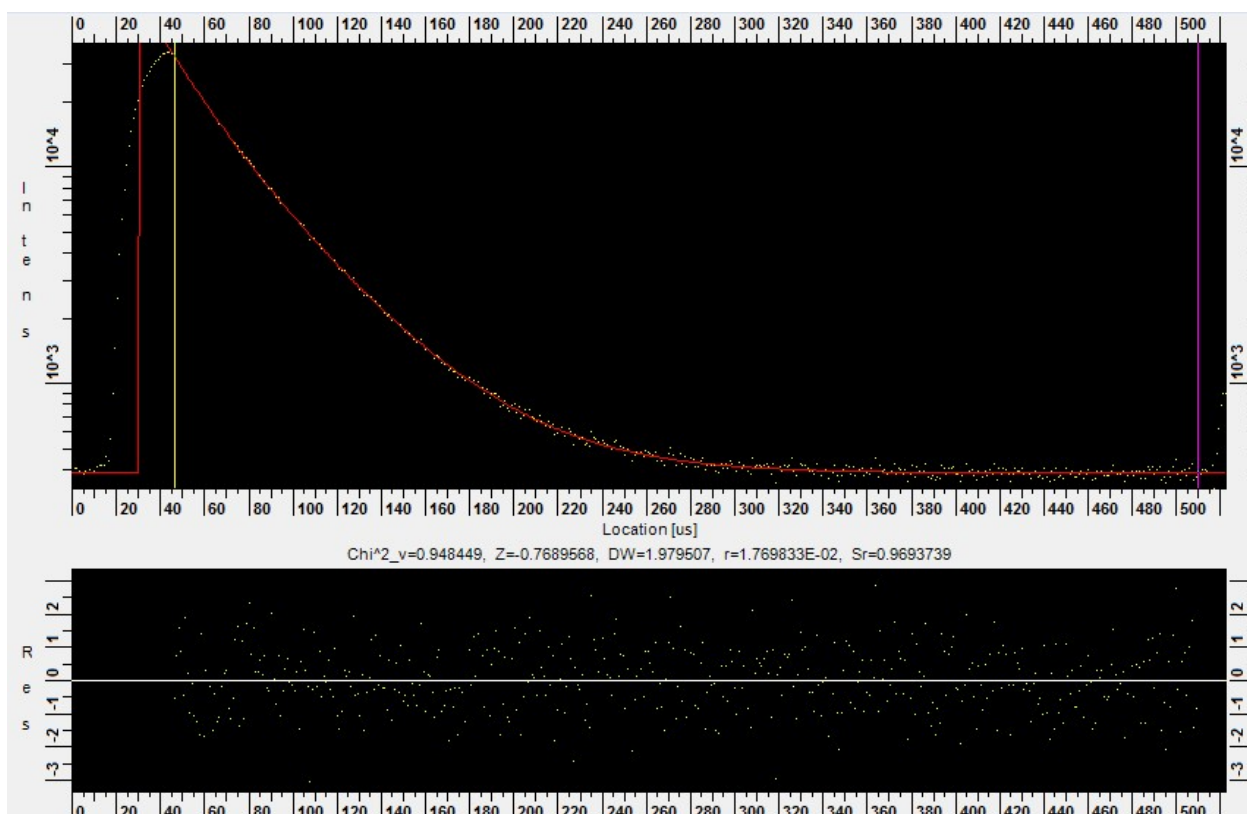

Figure S24. Emission decay profile of  $(\text{DAPIm})_2\text{Mo}_6$  in solid ( $\lambda_{\text{ex}} = 375 \text{ nm}$ )

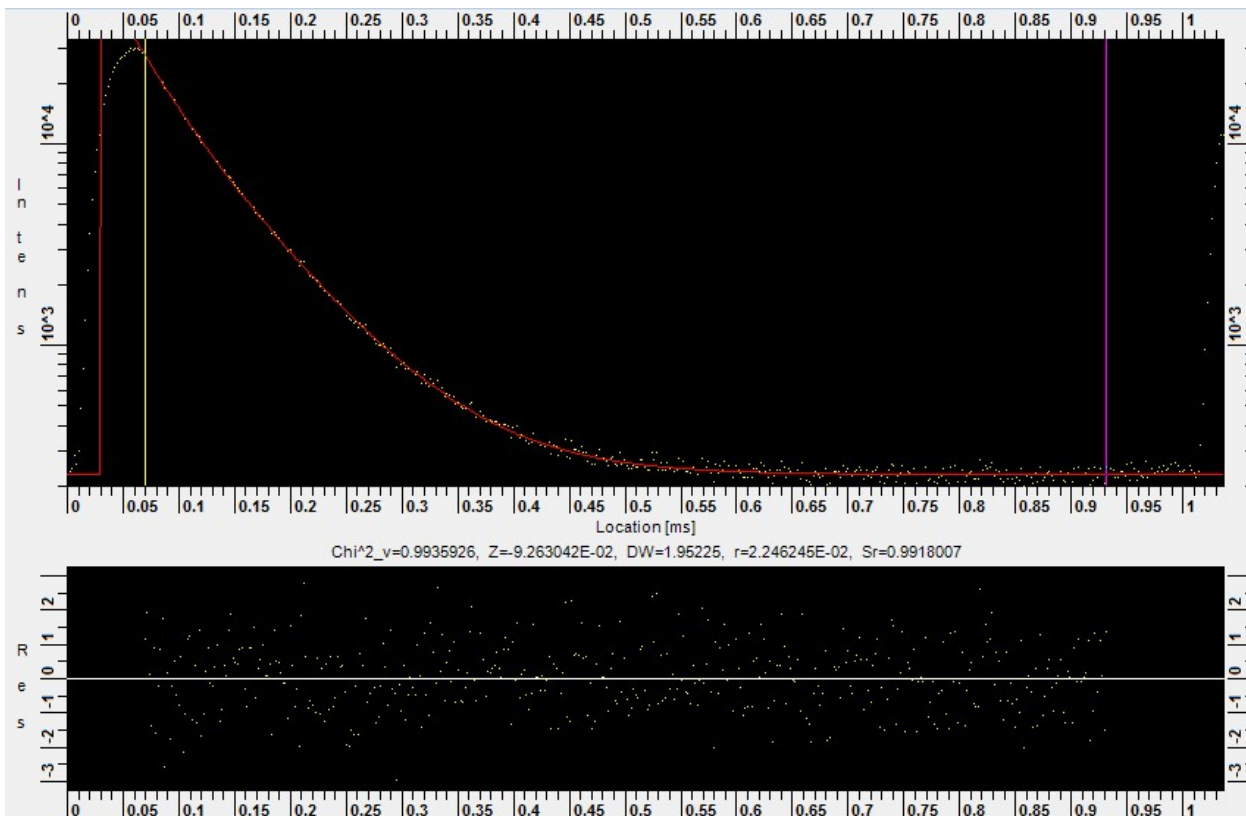

Figure S25. Emission decay profile of solid  $(\text{An-Th:DAPI})_2\text{Mo}_6$  ( $\lambda_{\text{ex}} = 375 \text{ nm}$ )

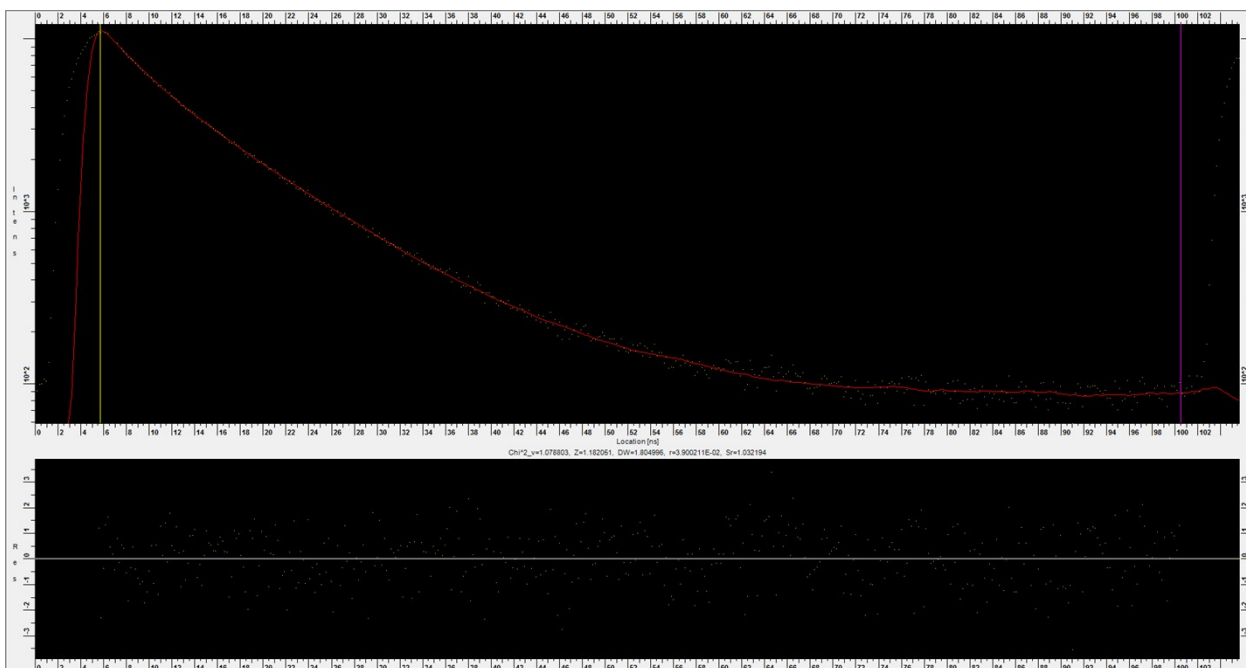

Figure S26. Emission decay profile of  $\text{Th-An-Th}$  in PMMA ( $\lambda_{\text{ex}} = 375 \text{ nm}$ )

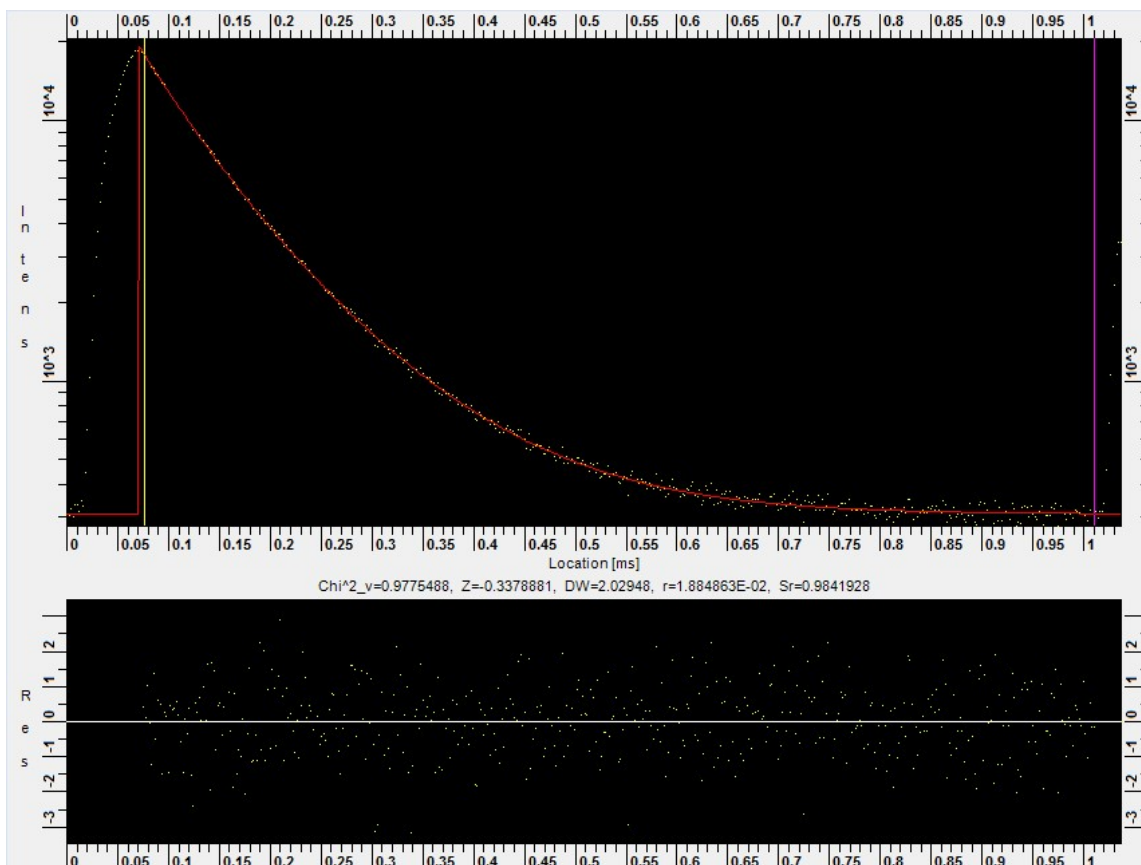

Figure S27. Emission decay profile of (DAPIm)<sub>2</sub>Mo<sub>6</sub> in PMMA ( $\lambda_{\text{ex}} = 375$  nm)

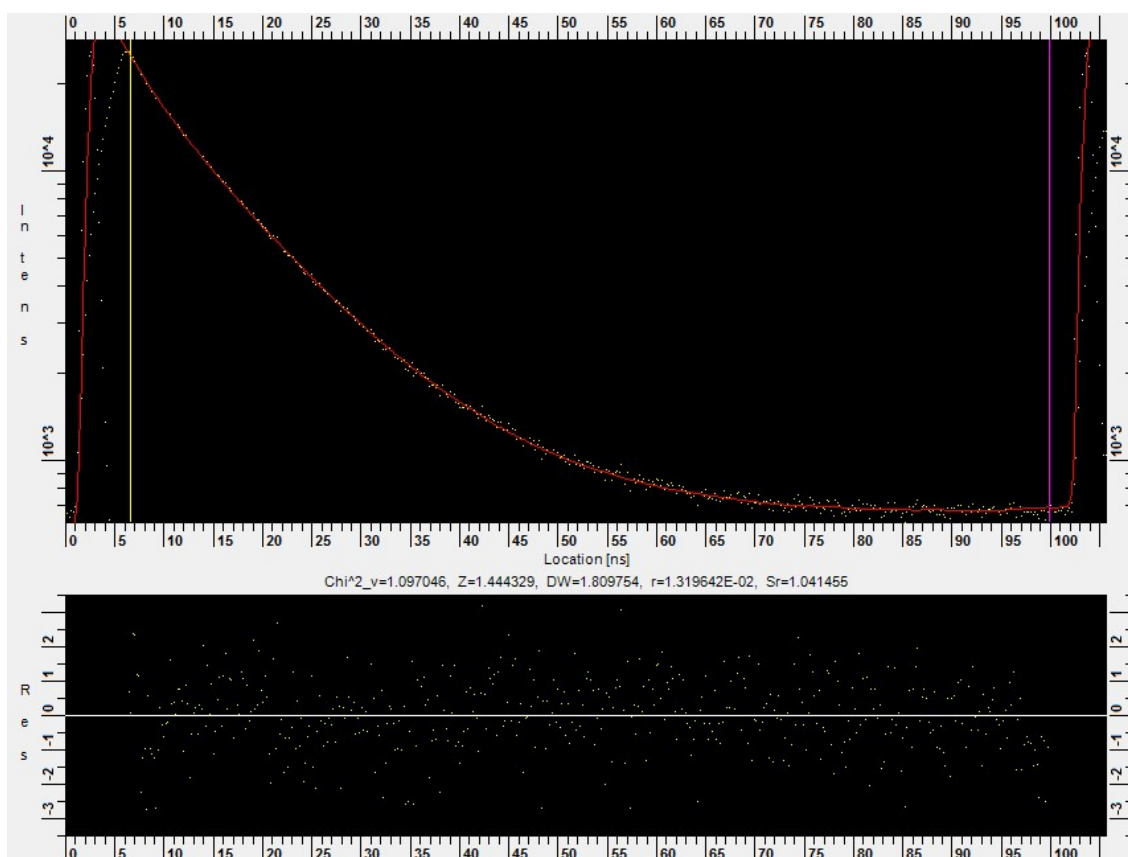

Figure S28. Emission decay profile of Th-An-Th:(DAPIm)<sub>2</sub>Mo<sub>6</sub> in PMMA ( $\lambda_{\text{ex}} = 375$  nm, Th-An-Th component)



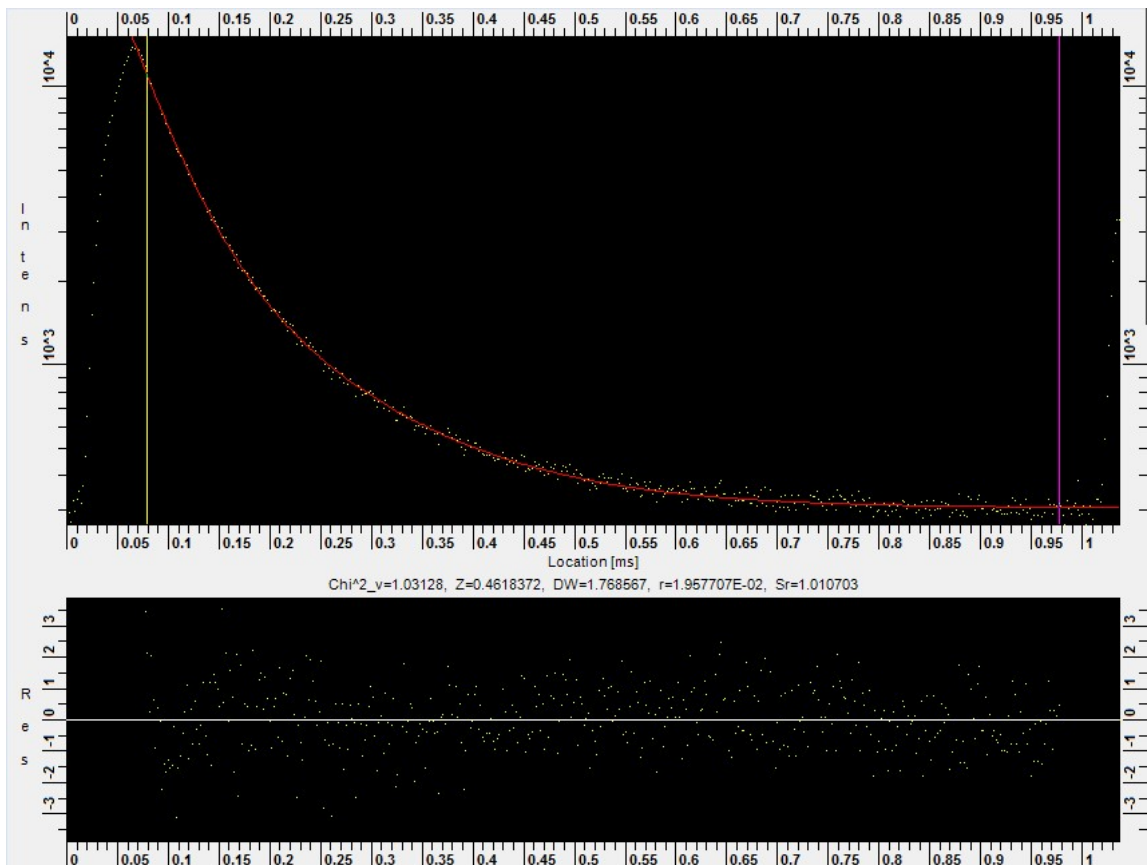

Figure S29. Emission decay profile of Th-An-Th:(DAPIm)<sub>2</sub>Mo<sub>6</sub> in PMMA ( $\lambda_{ex} = 375$  nm, Mo<sub>6</sub> component)

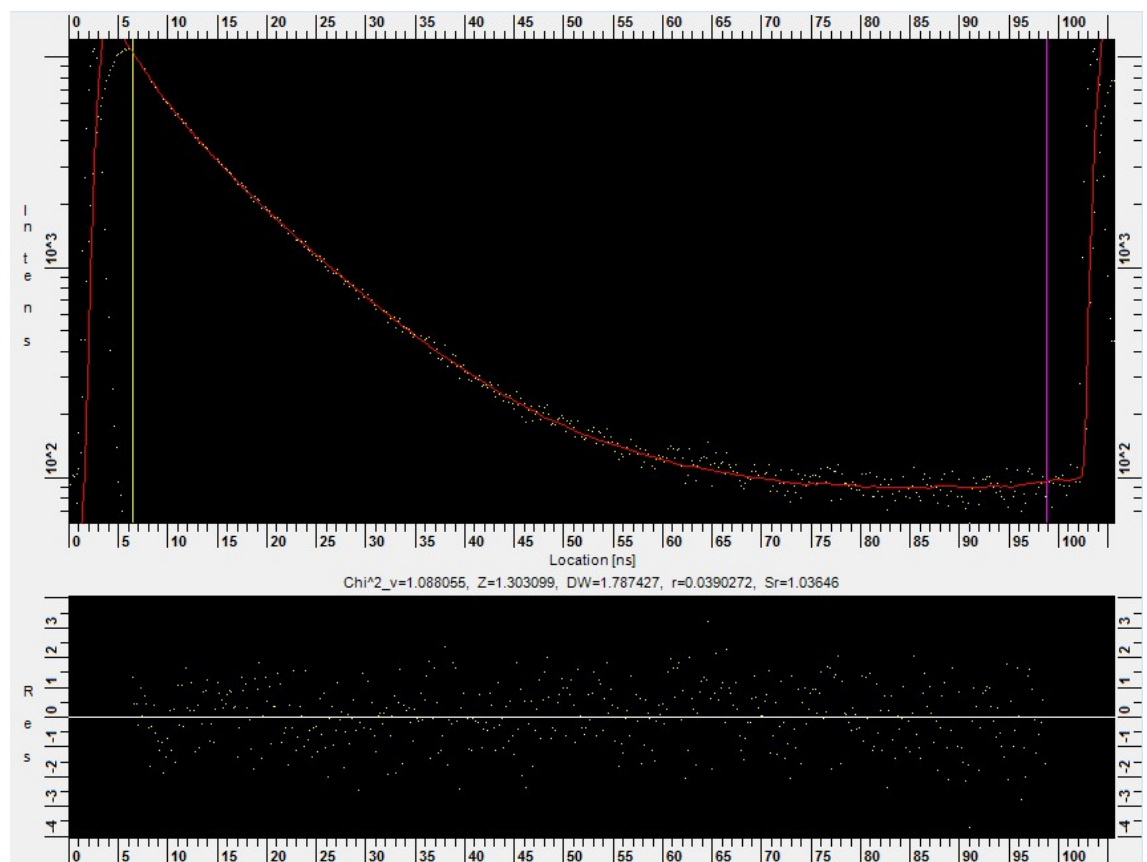

Figure S30. Emission decay profile of Th-An-Th:(DAPIm)<sub>2</sub>Mo<sub>6</sub> in PMMA in vacuum ( $\lambda_{ex} = 375$  nm, Th-An-Th component)

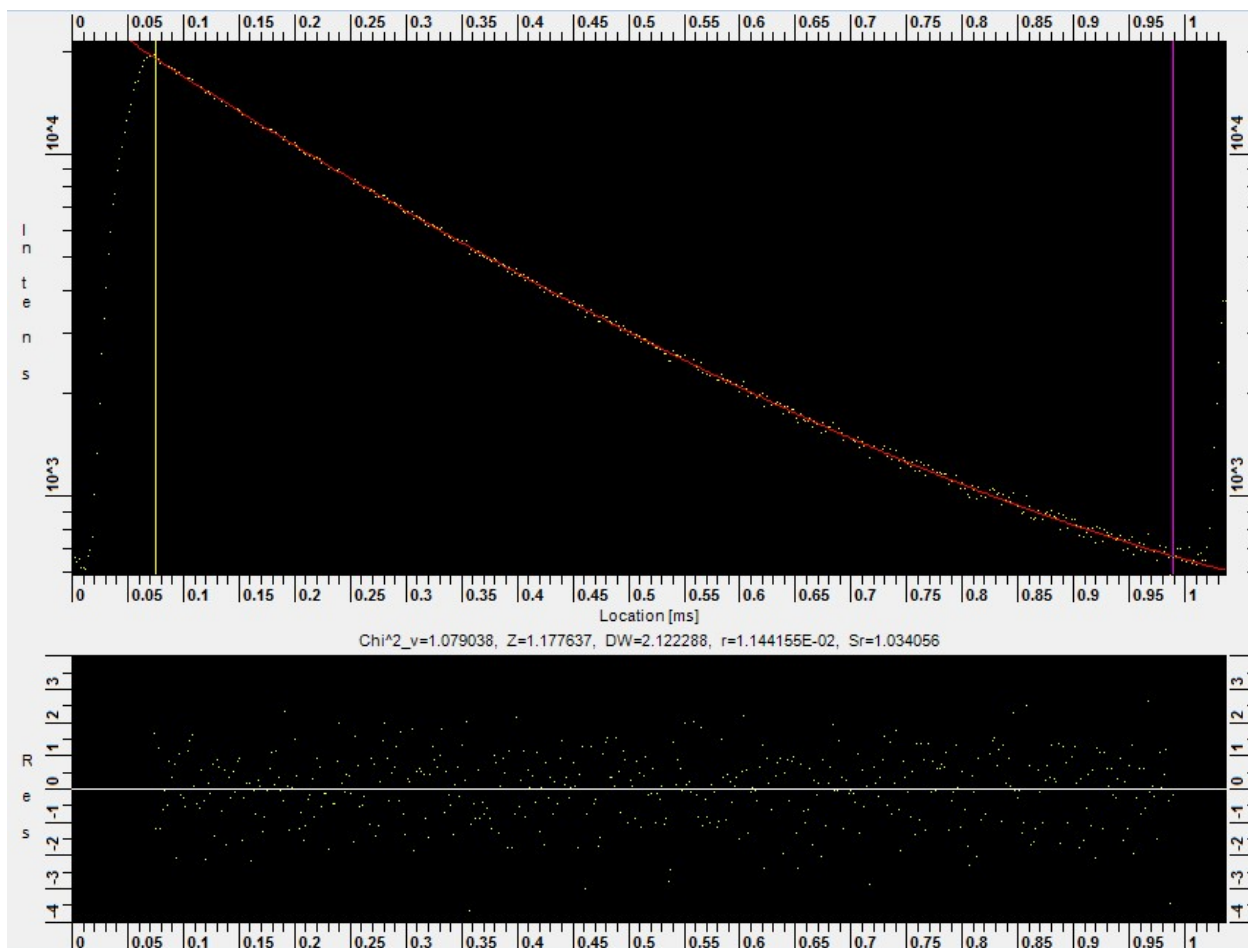

Figure S31. Emission decay profile of Th-An-Th:(DAPIm)<sub>2</sub>Mo<sub>6</sub> in PMMA in vacuum ( $\lambda_{\text{ex}} = 375$  nm, Mo<sub>6</sub> component)

## 5. Emission spectra

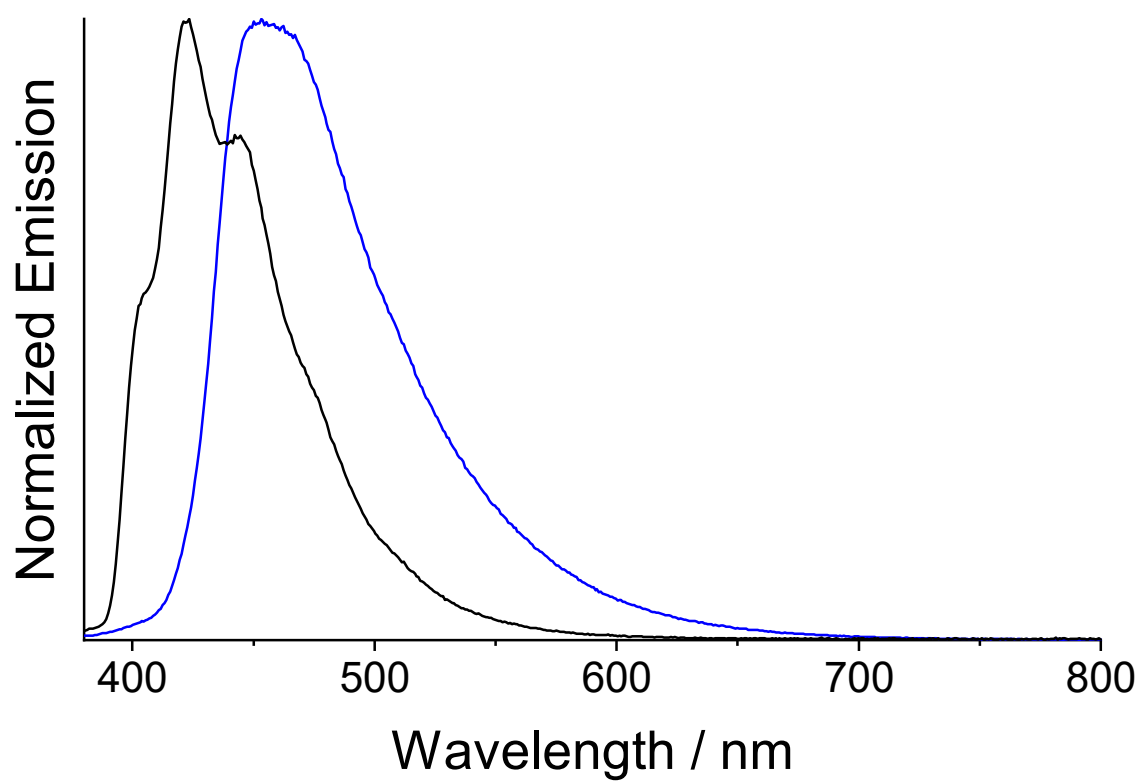

**Figure S32.** Emission spectra ( $\lambda_{\text{ex}} = 375 \text{ nm}$ ) of **An-Th** (black line) and **Th-An-Th** (blue line) in solid state

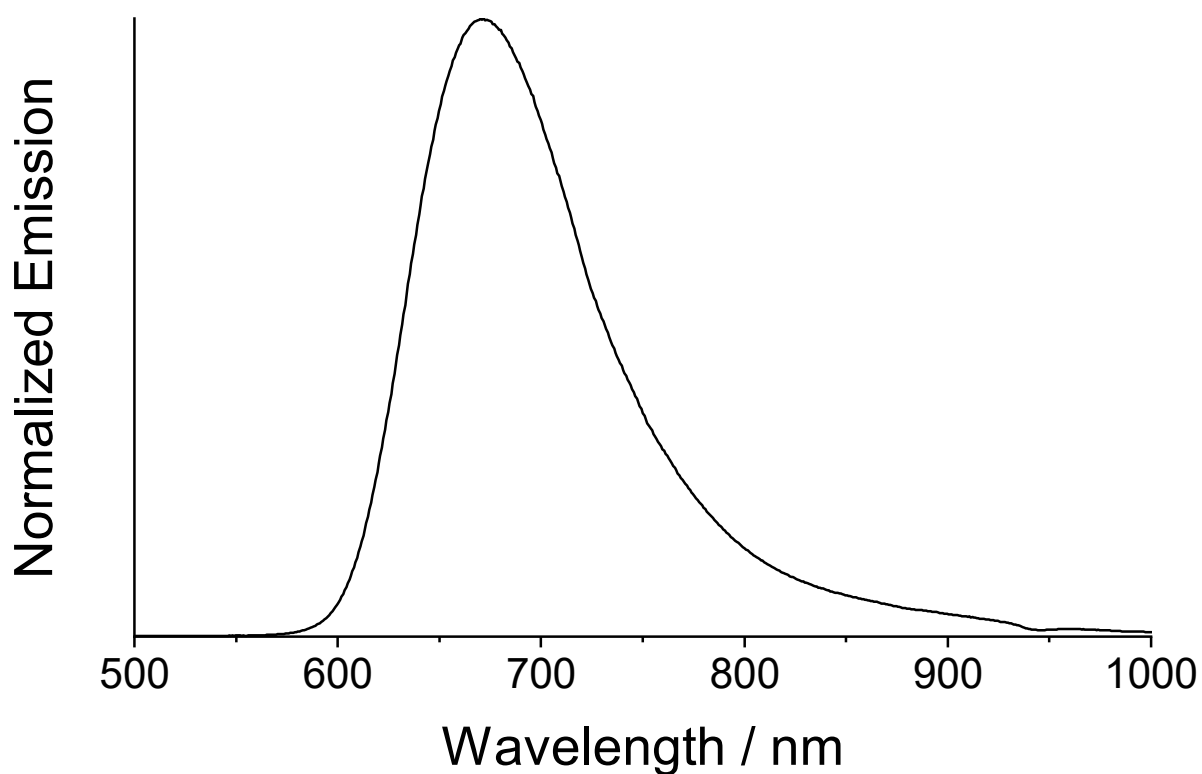

Figure S33. Emission spectrum ( $\lambda_{\text{ex}} = 375 \text{ nm}$ ) of  $(\text{DAPI}m)_2\text{Mo}_6$  in solid state

## 6. Förster radius determination

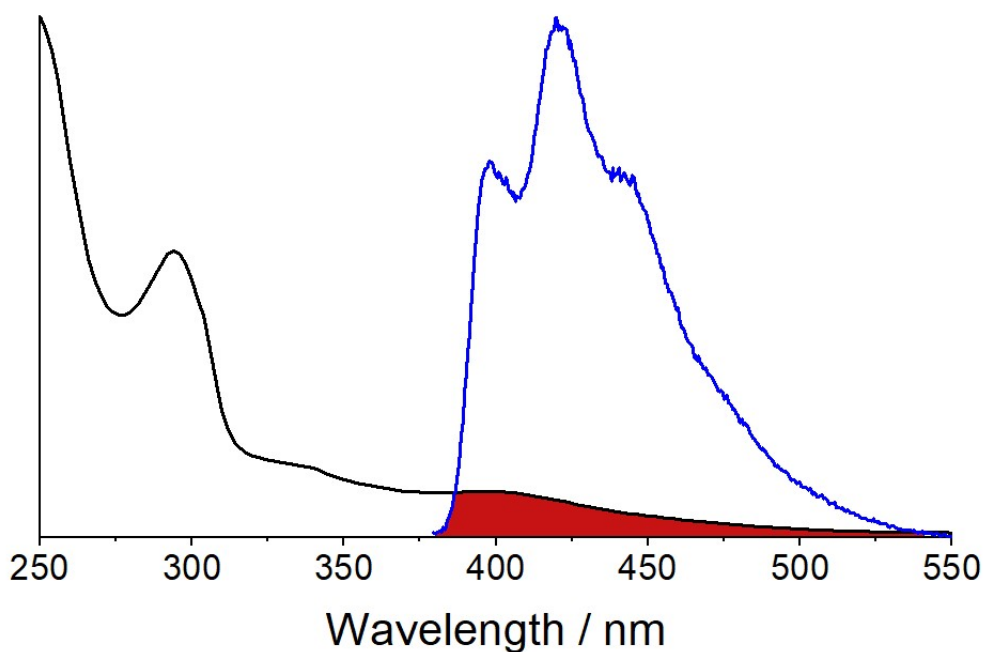

Figure S34. Representation of crossing of absorption spectrum of  $(\text{DAPI}m)_2\text{Mo}_6$  in  $\text{CHCl}_3$  and emission spectrum of **An-Th** in  $\text{CHCl}_3$

The following Förster rate equation describes the energy transfer by dipolar interaction:

$$k = \frac{1}{\tau_D} \left( \frac{R_0}{r} \right)^6, R_0^6 = 8.785 \times 10^{-5} \frac{K^2 \Phi_D J}{n^4}$$

Where  $\tau_D$  is the donor lifetime in the absence of acceptor,  $r$  is the donor-acceptor distance, and  $R_0$  is the Förster distance at which the energy transfer rate is equal to the decay rate. The Förster distance is related to the orientation factor,  $K^2$  between donor and acceptor, and the donor and acceptor spectroscopic properties.  $K$  was taken as 2/3 that is appropriate for dynamic random orientation averaging of the donor and acceptor.  $\Phi_D$  is the quantum yield of the donor in the absence of an acceptor (0.44 for An-Th). The index of refraction,  $n$ , is the index of refraction of  $\text{CHCl}_3$ : 1.4458.  $J$  is the overlap integral between the donor and acceptor that is calculated using the following equation:

$$J = \int_0^{+\infty} F_D(\lambda) \varepsilon_A(\lambda) \lambda^4 d\lambda$$

Where  $F_D$  is the area-normalized fluorescence spectrum of the donor,<sup>[1]</sup>  $\varepsilon_A$  is the molar absorption coefficient of the acceptor. The scaling constant is set such that when  $\varepsilon$  is in units of  $\text{M}^{-1} \cdot \text{cm}^{-1}$  and wavelength in units of nm, the Förster distance is in units of Å.<sup>[2]</sup>

The Förster radius was evaluated at 298K.

## 7. Emission titration data

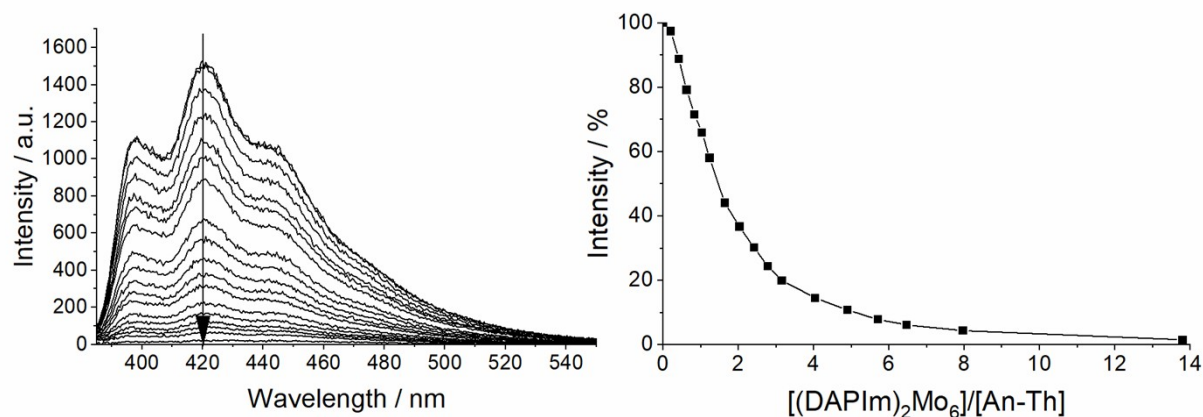

**Figure S35.** Emission spectra of An-Th ( $C = 1.23 \cdot 10^{-5} \text{M}$  in  $\text{CHCl}_3$ ) upon addition of aliquots of  $(\text{DAPI}m)_2\text{Mo}_6$

**Table S3.** Anthracene excited state lifetime evolution ( $[\text{An-Th}] = 1.23 \cdot 10^{-5} \text{M}$ ) upon addition of  $(\text{DAPI}m)_2\text{Mo}_6$  in  $\text{CHCl}_3$

| $[(\text{DAPI}m)_2\text{Mo}_6]/[\text{An-Th}]$ | $\tau_1$ , ns (A) | $\tau_2$ , ns (A) | $\tau_{av}$ , ns |
|------------------------------------------------|-------------------|-------------------|------------------|
| 0.4                                            | 5.8               | -                 | 5.8              |
| 0.7                                            | 10 (18 %)         | 5.1 (82 %)        | 6.6              |
| 1.8                                            | 7.9 (44 %)        | 3.7 (56 %)        | 6.3              |
| 3.4                                            | 8.3 (39 %)        | 3.8 (61 %)        | 6.4              |

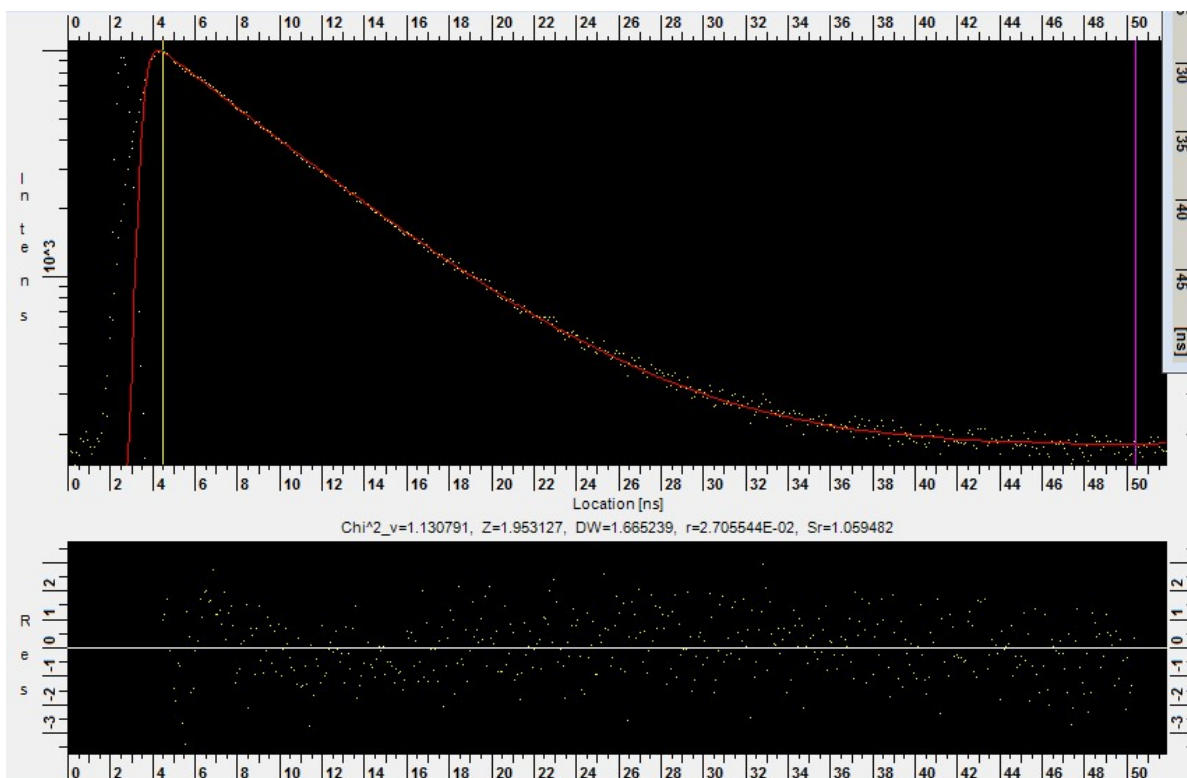

Figure S36. Emission decay profile of mixture of (DAPIm)<sub>2</sub>Mo<sub>6</sub> and An-Th in CHCl<sub>3</sub> ( $[(\text{DAPIm})_2\text{Mo}_6]/[\text{An-Th}] = 0.4$ )

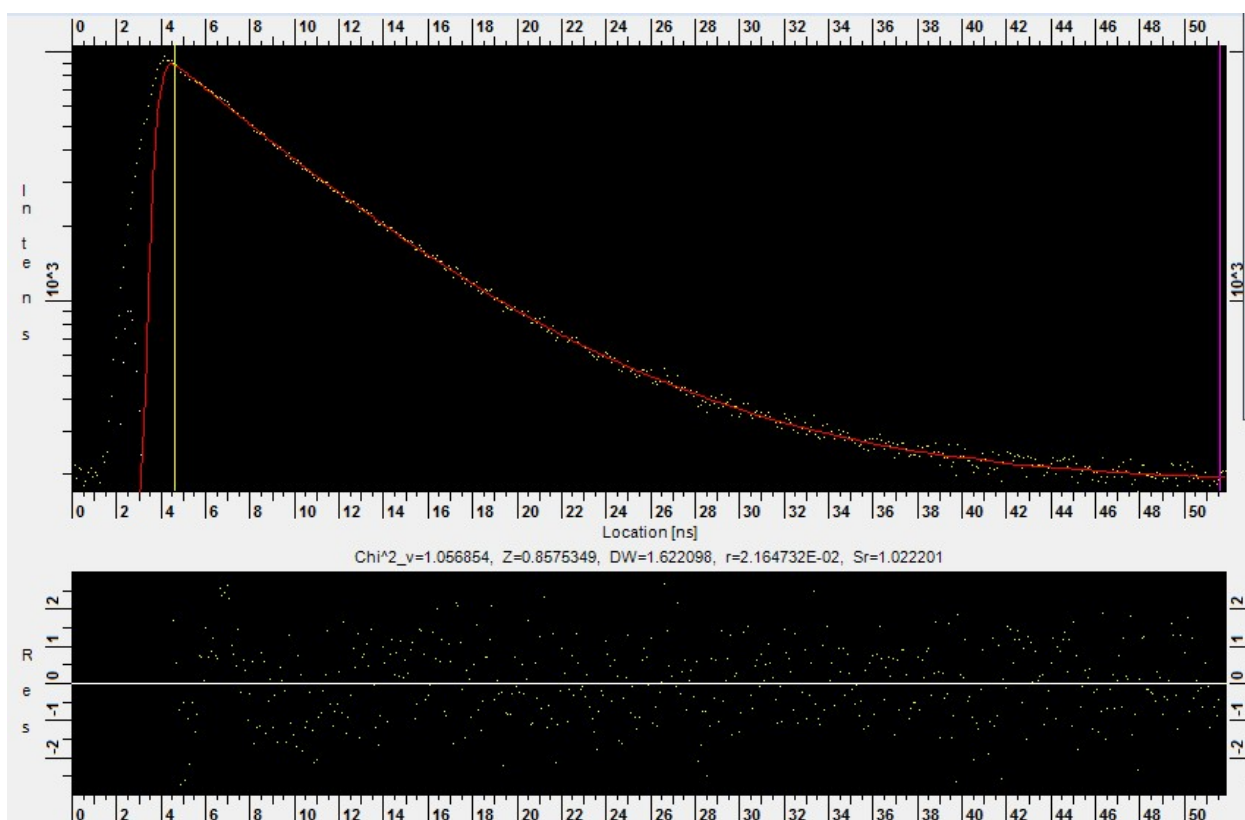

Figure S37. Emission decay profile of mixture of (DAPIm)<sub>2</sub>Mo<sub>6</sub> and An-Th in CHCl<sub>3</sub> ( $[(\text{DAPIm})_2\text{Mo}_6]/[\text{An-Th}] = 0.7$ )

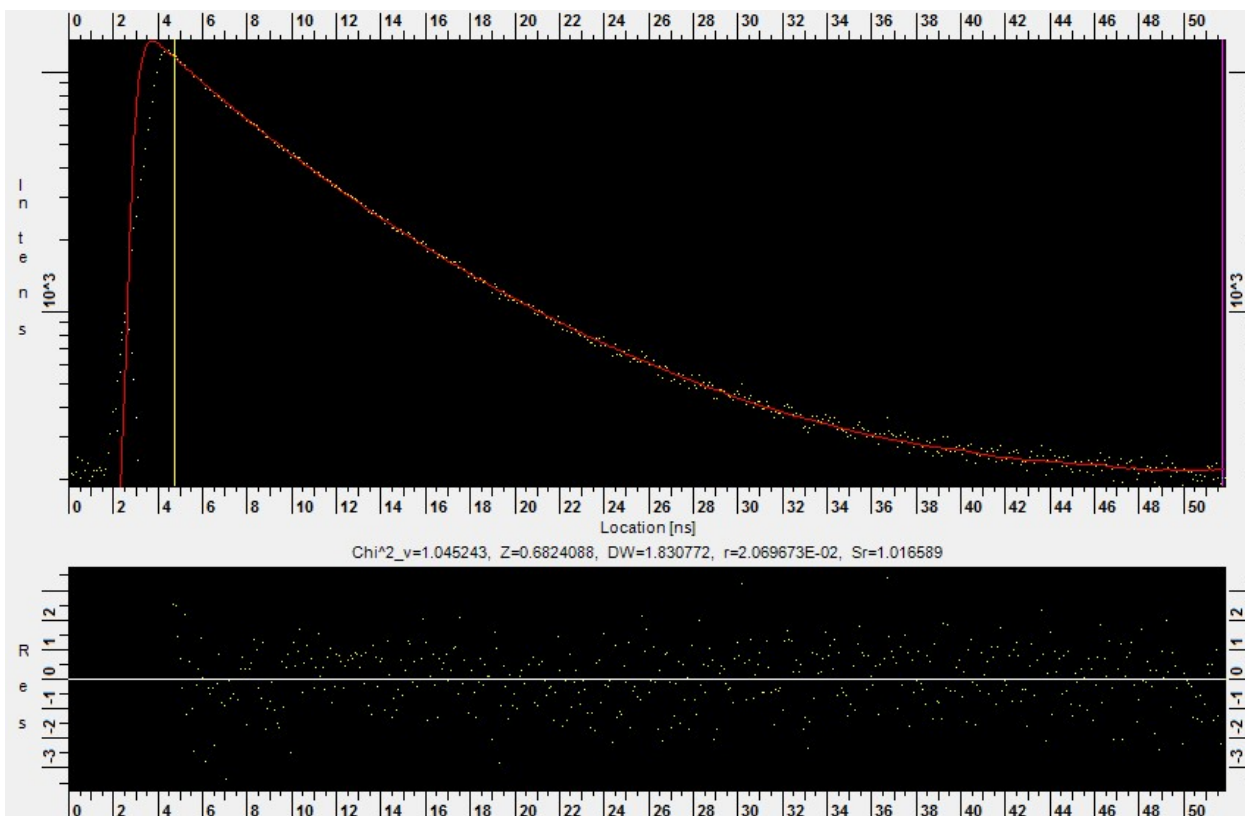

Figure S38. Emission decay profile of mixture of (DAPIm)<sub>2</sub>Mo<sub>6</sub> and An-Th in CHCl<sub>3</sub> ( $[(\text{DAPIm})_2\text{Mo}_6]/[\text{An-Th}] = 1.8$ )

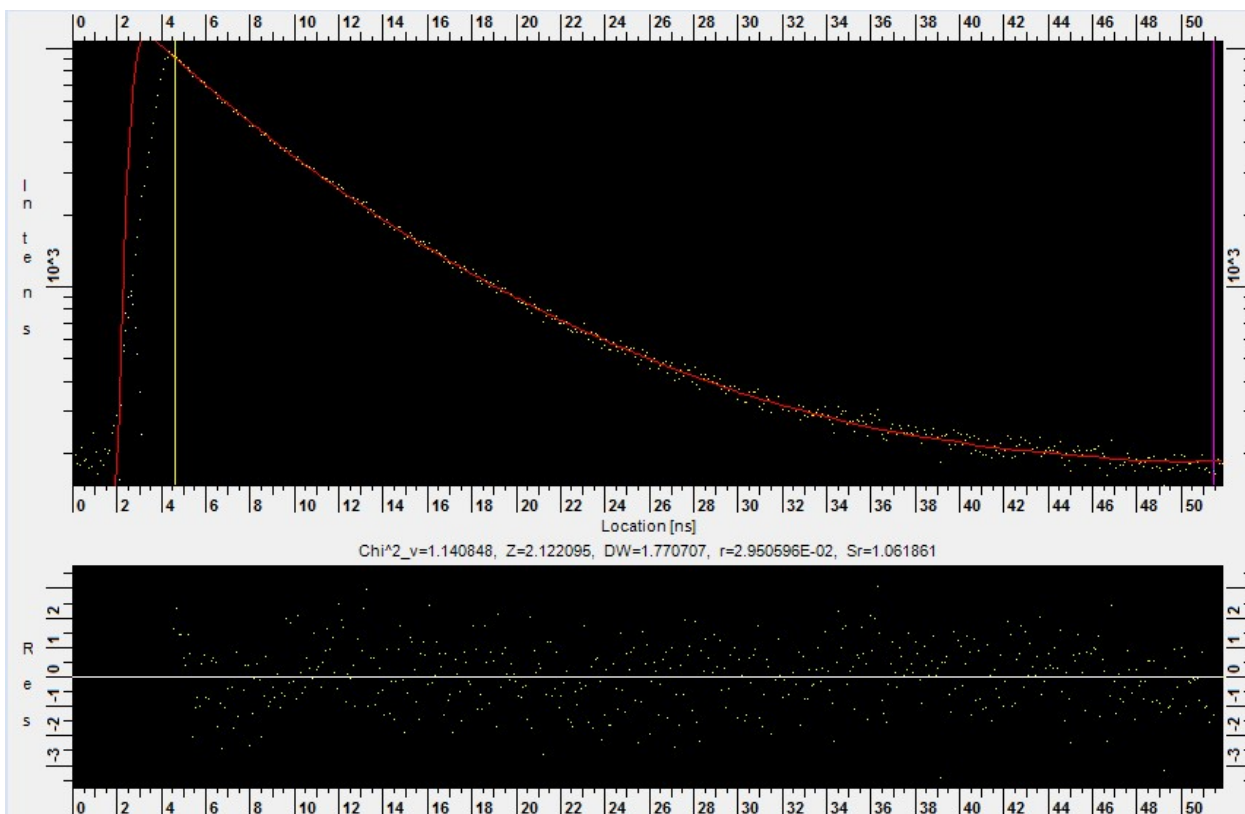

Figure S39. Emission decay profile of mixture of (DAPIm)<sub>2</sub>Mo<sub>6</sub> and An-Th in CHCl<sub>3</sub> ( $[(\text{DAPIm})_2\text{Mo}_6]/[\text{An-Th}] = 3.4$ )

## 8. Emission evolution in vacuum

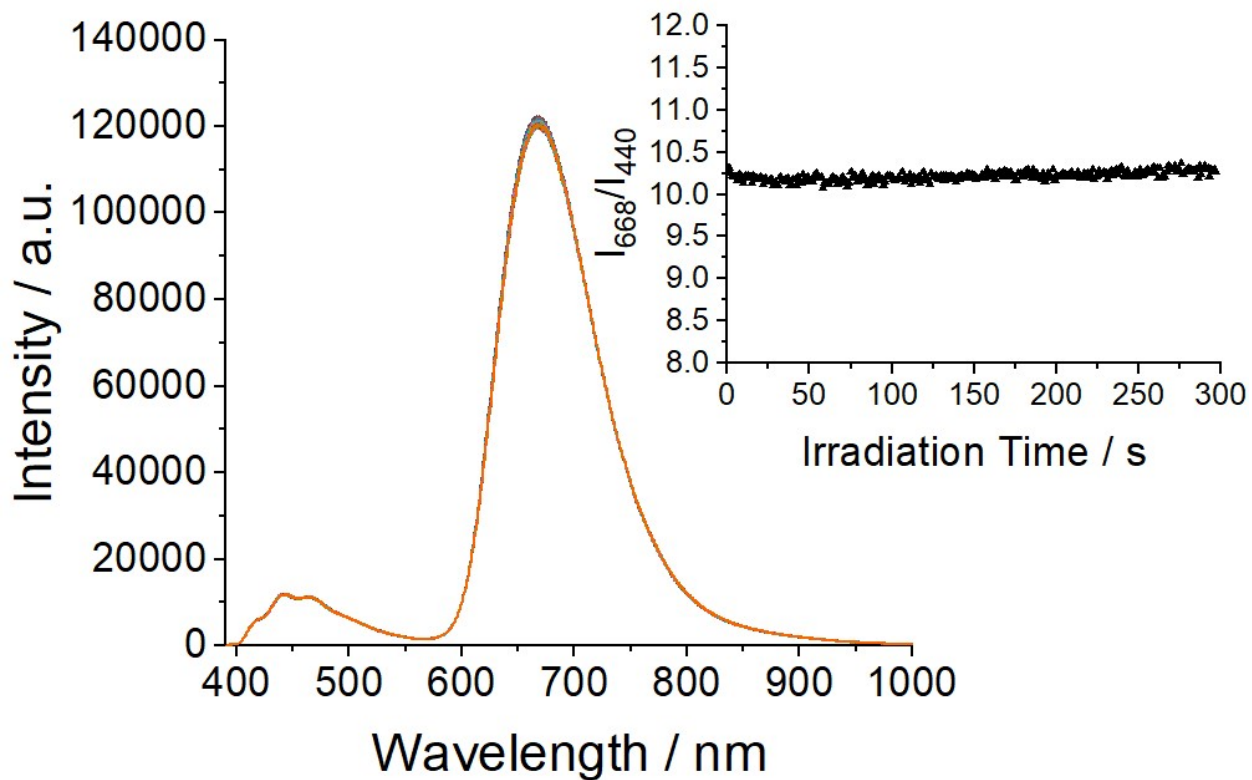

**Figure S40.** Evolution of emission spectra of Th-An-Th:(DAPI)<sub>m</sub>Mo<sub>6</sub> under 5 min laser irradiation in vacuum ( $\lambda_{\text{ex}} = 375$  nm, laser diode, 100 MHz, 100 ms int. time,  $1.9 \cdot 10^{-6}$  hPa)

- [1] J. R. Lakowicz, *Principles of Fluorescence Spectroscopy, third edition*, Springer, Boston, MA, **2006**.
- [2] P. G. Wu, L. Brand, *Anal. Biochem.* **1994**, *218*, 1-13.
